# Supplementary material for: Transcriptomics and Metabolomics of Reactive Oxygen Species Modulation in Near-Null Magnetic Field-Induced Arabidopsis thaliana
Source: MDPI journal article supplement (doi:10.3390/biom12121824), 2022-12-06
Supplement: s1 [file s1]

**Supplementary Table S1:** List of primers used for validation using qRT-PCR.

| Gene               | Locus            | Sequence 5'→3'         |         |
|--------------------|------------------|------------------------|---------|
| <i>ACT1</i>        | <i>At2g37620</i> | TGCACTTCCACATGCTATCC   | Forward |
| <i>ACT1</i>        | <i>At2g37620</i> | GAGCTGGTTTTGGCTGTCTC   | Reverse |
| <i>eEF1Balpha2</i> | <i>At5g19510</i> | ACTTGTACCAGTTGGTTATGGG | Forward |
| <i>eEF1Balpha2</i> | <i>At5g19510</i> | CTGGATGTACTCGTTGTTAGGC | Reverse |
| <i>GAPC2</i>       | <i>At1g13440</i> | TCAGGAACCCTGAGGACATC   | Forward |
| <i>GAPC2</i>       | <i>At1g13440</i> | CGTTGACACCAACAACGAAC   | Reverse |
| <i>UBP6</i>        | <i>At1g51710</i> | GAAAGTGGATTACCCGCTG    | Forward |
| <i>UBP6</i>        | <i>At1g51710</i> | CTCTAAGTTTCTGGCGAGGAG  | Reverse |
| <i>PER14</i>       | <i>At2g18140</i> | ACGCCTTAACTCTAGCTGCT   | Forward |
| <i>PER14</i>       | <i>At2g18140</i> | ACAAGTTGTCGGGTTTCAGGA  | Reverse |
| <i>GULLO1</i>      | <i>At1g32300</i> | CGTGCAGCCAAAGTTTCTCT   | Forward |
| <i>GULLO1</i>      | <i>At1g32300</i> | TTTGCCTTGGCTTGGTAACC   | Reverse |
| <i>MSD2</i>        | <i>At3g56350</i> | AACCACCGCATGATCCTTTG   | Forward |
| <i>MSD2</i>        | <i>At3g56350</i> | CTGGTTGGCTGTGGTTTCAA   | Reverse |
