# Supplementary material for: Transcriptomics and Metabolomics of Reactive Oxygen Species Modulation in Near-Null Magnetic Field-Induced Arabidopsis thaliana
Source: MDPI journal article supplement (doi:10.3390/biom12121824), 2022-12-06
Supplement: s1 [file s1]

## Supplementary Dataset S1

### Gene expression changes, statistical analysis and fold change volcano plots for all time points assessed

10 min

#### Test Description

Selected Test : T Test Against Zero  
p-value computation: Asymptotic  
Multiple Testing Correction: Benjamini-Hochberg

#### Result Summary

|                   | P all | P < 0.05 | P < 0.02 | P < 0.01 | P < 0.0050 | P < 0.0010 |
|-------------------|-------|----------|----------|----------|------------|------------|
| FC all            | 37538 | 10811    | 9153     | 8207     | 7362       | 5769       |
| FC > 1.1          | 18950 | 10307    | 8932     | 8093     | 7297       | 5753       |
| FC > 1.5          | 9827  | 8982     | 8181     | 7616     | 6974       | 5636       |
| FC > 2.0          | 3654  | 3591     | 3499     | 3392     | 3219       | 2809       |
| FC > 3.0          | 142   | 136      | 120      | 93       | 52         | 21         |
| Expected by ch... |       | 540      | 183      | 82       | 36         | 5          |

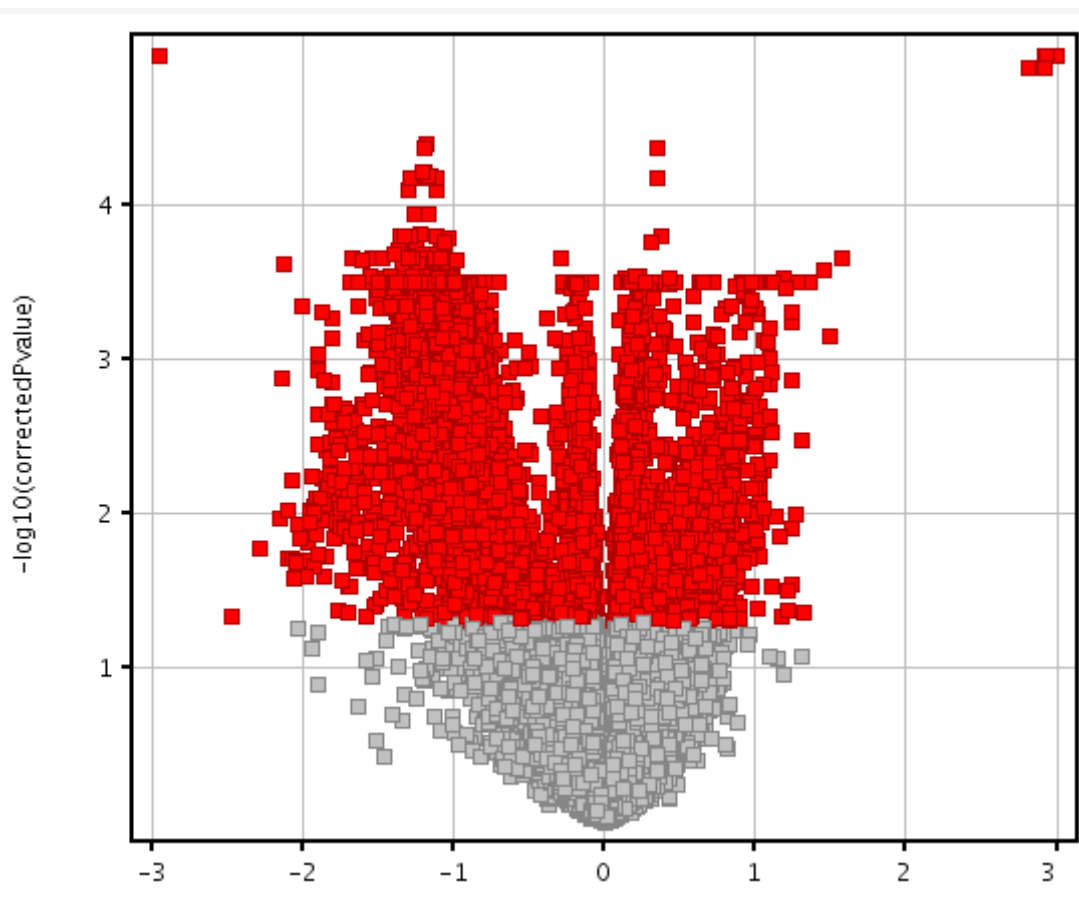

1 h

Test Description

Selected Test : T Test Against Zero  
p-value computation: Asymptotic  
Multiple Testing Correction: Benjamini-Hochberg

Result Summary

|              | P all | P < 0.05 | P < 0.02 | P < 0.01 | P < 0.0050 | P < 0.0... |
|--------------|-------|----------|----------|----------|------------|------------|
| FC all       | 37538 | 10321    | 8725     | 7887     | 7212       | 5997       |
| FC > 1.1     | 20051 | 9900     | 8570     | 7810     | 7176       | 5991       |
| FC > 1.5     | 10063 | 8593     | 7915     | 7423     | 6960       | 5939       |
| FC > 2.0     | 6713  | 6653     | 6551     | 6431     | 6294       | 5698       |
| FC > 3.0     | 29    | 25       | 24       | 21       | 19         | 15         |
| Expected ... |       | 516      | 174      | 78       | 36         | 5          |

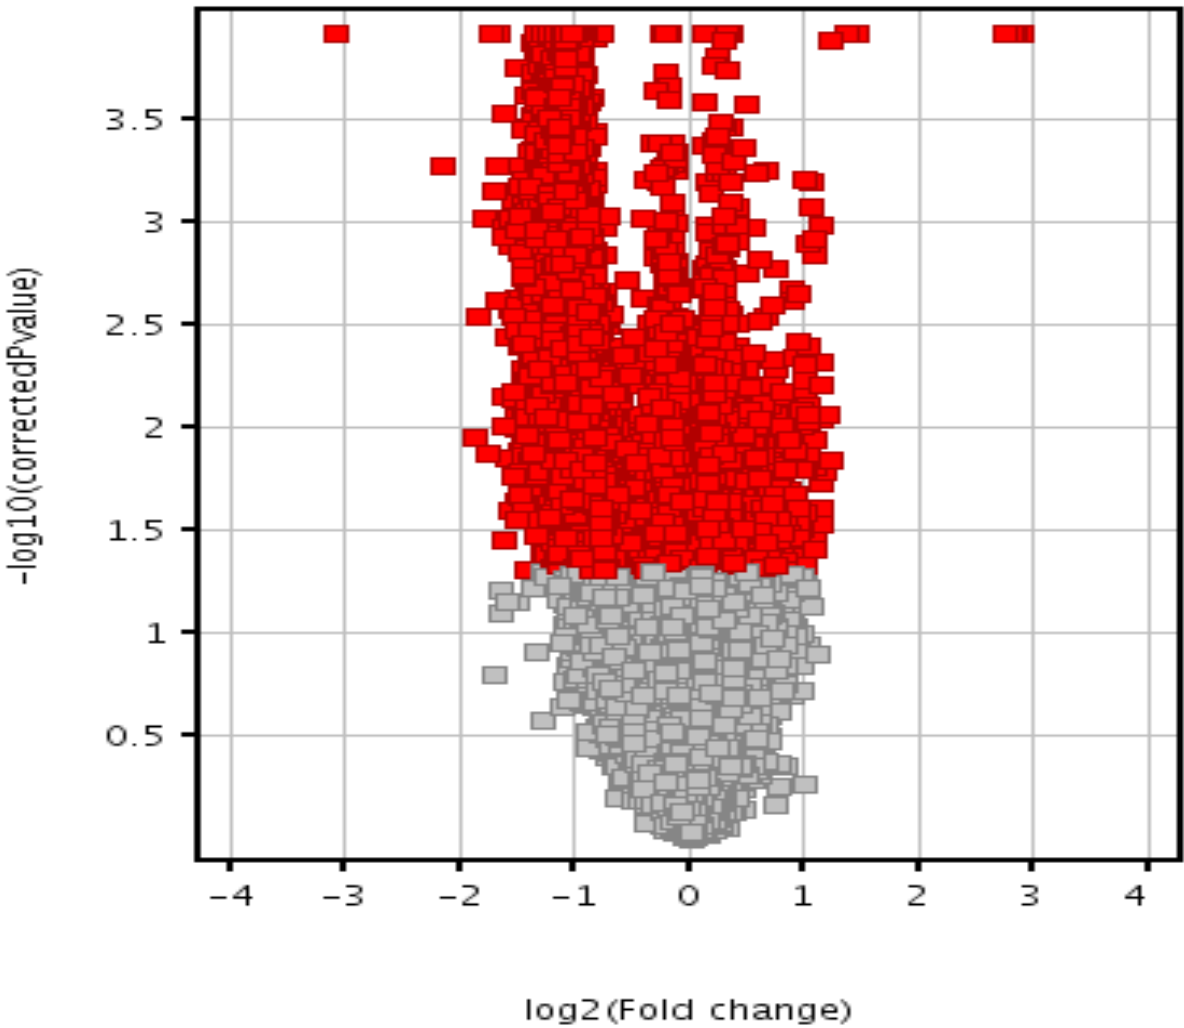

2 h

Test Description

Selected Test : T Test Against Zero  
p-value computation: Asymptotic  
Multiple Testing Correction: Benjamini-Hochberg

Result Summary

|                   | P all | P < 0.05 | P < 0.02 | P < 0.01 | P < 0.0050 | P < 0.0010 |
|-------------------|-------|----------|----------|----------|------------|------------|
| FC all            | 37538 | 10876    | 9084     | 8123     | 7363       | 6133       |
| FC > 1.1          | 18830 | 10118    | 8760     | 7950     | 7288       | 6119       |
| FC > 1.5          | 9748  | 8521     | 7812     | 7319     | 6883       | 5976       |
| FC > 2.0          | 6286  | 6248     | 6174     | 6086     | 5974       | 5612       |
| FC > 3.0          | 21    | 19       | 18       | 15       | 15         | 13         |
| Expected by ch... |       | 543      | 181      | 81       | 36         | 6          |

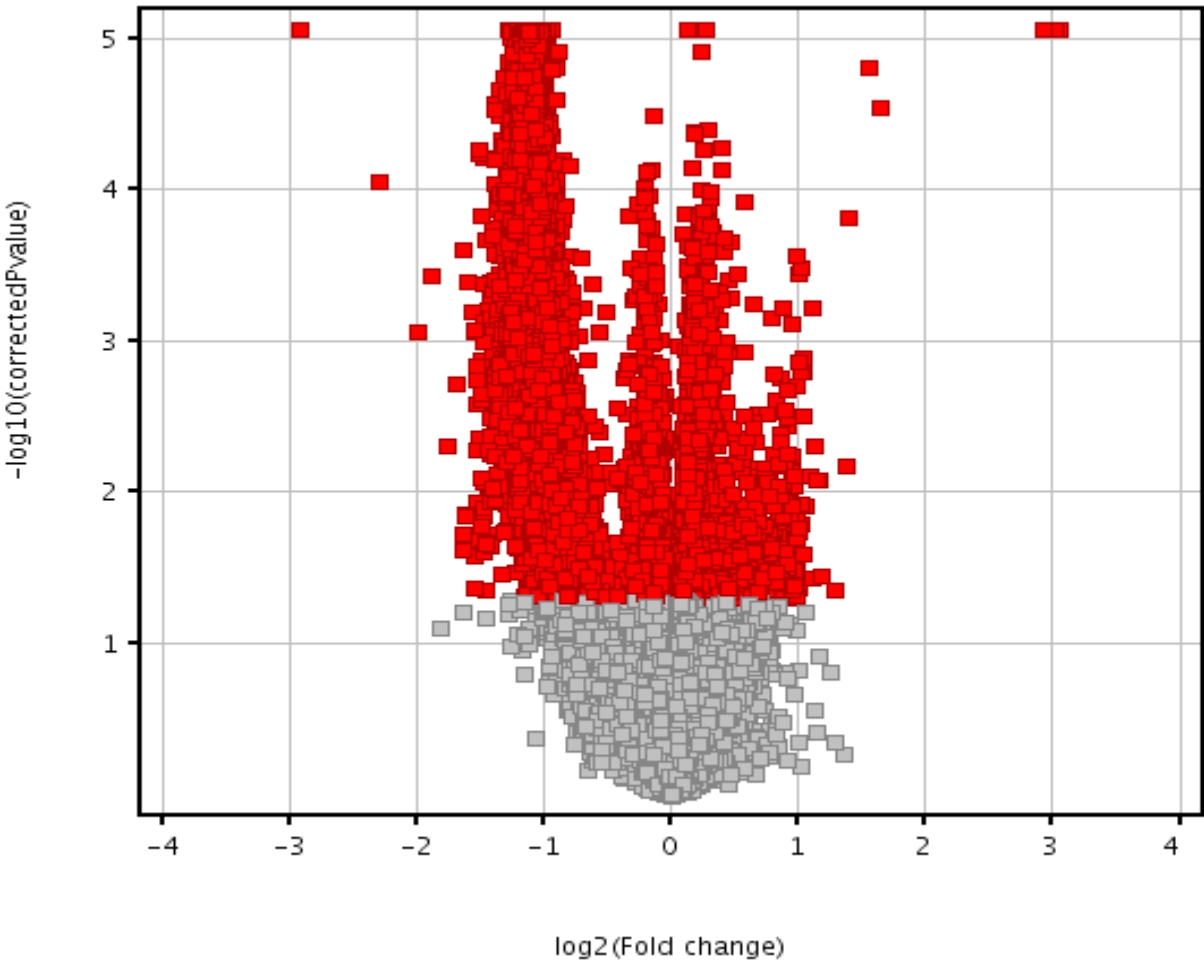

4 h

| Test Description                                |       |          |          |          |            |            |
|-------------------------------------------------|-------|----------|----------|----------|------------|------------|
| Selected Test : T Test Against Zero             |       |          |          |          |            |            |
| p-value computation: Asymptotic                 |       |          |          |          |            |            |
| Multiple Testing Correction: Benjamini-Hochberg |       |          |          |          |            |            |
| Result Summary                                  |       |          |          |          |            |            |
|                                                 | P all | P < 0.05 | P < 0.02 | P < 0.01 | P < 0.0050 | P < 0.0010 |
| FC all                                          | 37538 | 11135    | 9057     | 7982     | 7136       | 5759       |
| FC > 1.1                                        | 21896 | 10709    | 8901     | 7908     | 7098       | 5753       |
| FC > 1.5                                        | 9557  | 8557     | 7826     | 7298     | 6770       | 5666       |
| FC > 2.0                                        | 2056  | 2018     | 1965     | 1904     | 1804       | 1464       |
| FC > 3.0                                        | 21    | 16       | 14       | 14       | 13         | 11         |
| Expected by ch...                               |       | 556      | 181      | 79       | 35         | 5          |

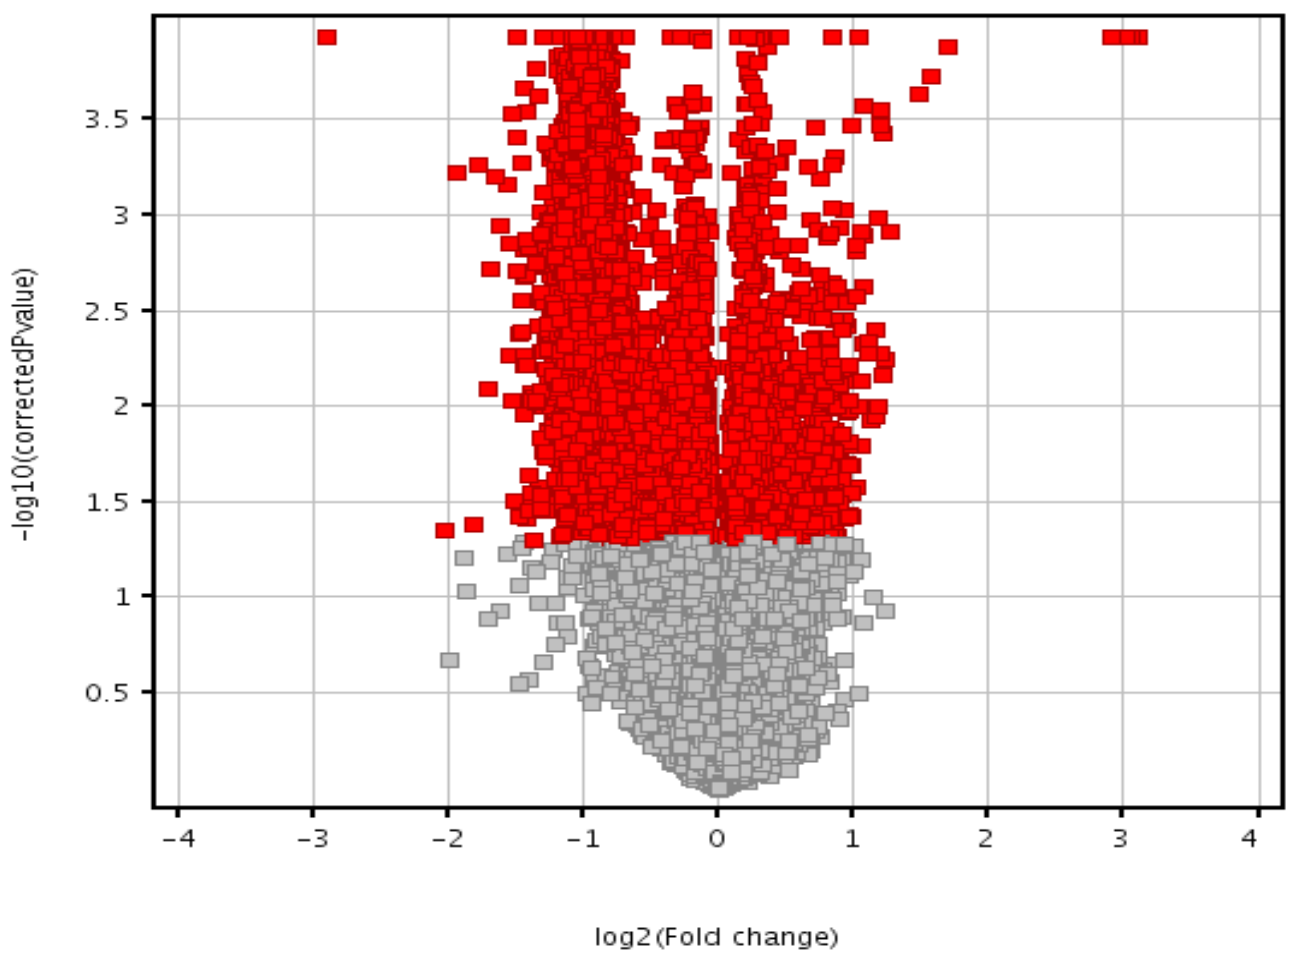

24 h

| Test Description                                |       |          |          |          |            |            |
|-------------------------------------------------|-------|----------|----------|----------|------------|------------|
| Selected Test : T Test Against Zero             |       |          |          |          |            |            |
| p-value computation: Asymptotic                 |       |          |          |          |            |            |
| Multiple Testing Correction: Benjamini-Hochberg |       |          |          |          |            |            |
| Result Summary                                  |       |          |          |          |            |            |
|                                                 | P all | P < 0.05 | P < 0.02 | P < 0.01 | P < 0.0050 | P < 0.0010 |
| FC all                                          | 37538 | 7984     | 6861     | 6171     | 5597       | 0          |
| FC > 1.1                                        | 19702 | 7900     | 6836     | 6163     | 5590       | 0          |
| FC > 1.5                                        | 9544  | 7443     | 6648     | 6065     | 5539       | 0          |
| FC > 2.0                                        | 4244  | 4104     | 3972     | 3849     | 3712       | 0          |
| FC > 3.0                                        | 12    | 11       | 10       | 9        | 9          | 0          |
| Expected by ch...                               |       | 399      | 137      | 61       | 27         | 0          |

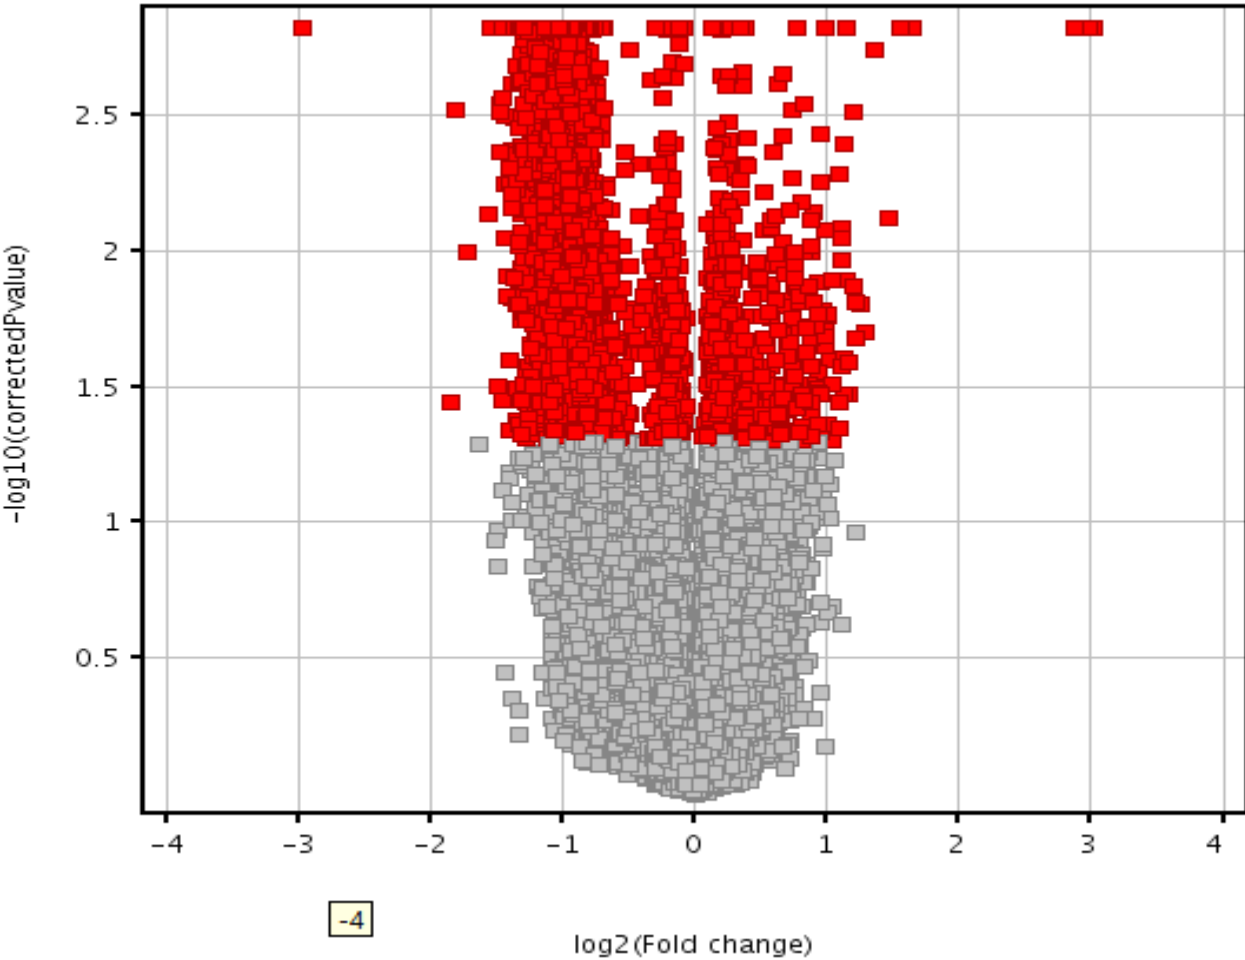

48 h

Test Description

Selected Test : T Test Against Zero  
p-value computation: Asymptotic  
Multiple Testing Correction: Benjamini-Hochberg

Result Summary

|                   | P all | P < 0.05 | P < 0.02 | P < 0.01 | P < 0.0050 | P < 0.0010 |
|-------------------|-------|----------|----------|----------|------------|------------|
| FC all            | 37538 | 10963    | 8932     | 7808     | 6932       | 5512       |
| FC > 1.1          | 20281 | 10246    | 8621     | 7643     | 6843       | 5496       |
| FC > 1.5          | 9676  | 8202     | 7418     | 6830     | 6304       | 5285       |
| FC > 2.0          | 6565  | 6522     | 6418     | 6225     | 5957       | 5201       |
| FC > 3.0          | 49    | 48       | 45       | 43       | 39         | 23         |
| Expected by ch... |       | 548      | 178      | 78       | 34         | 5          |

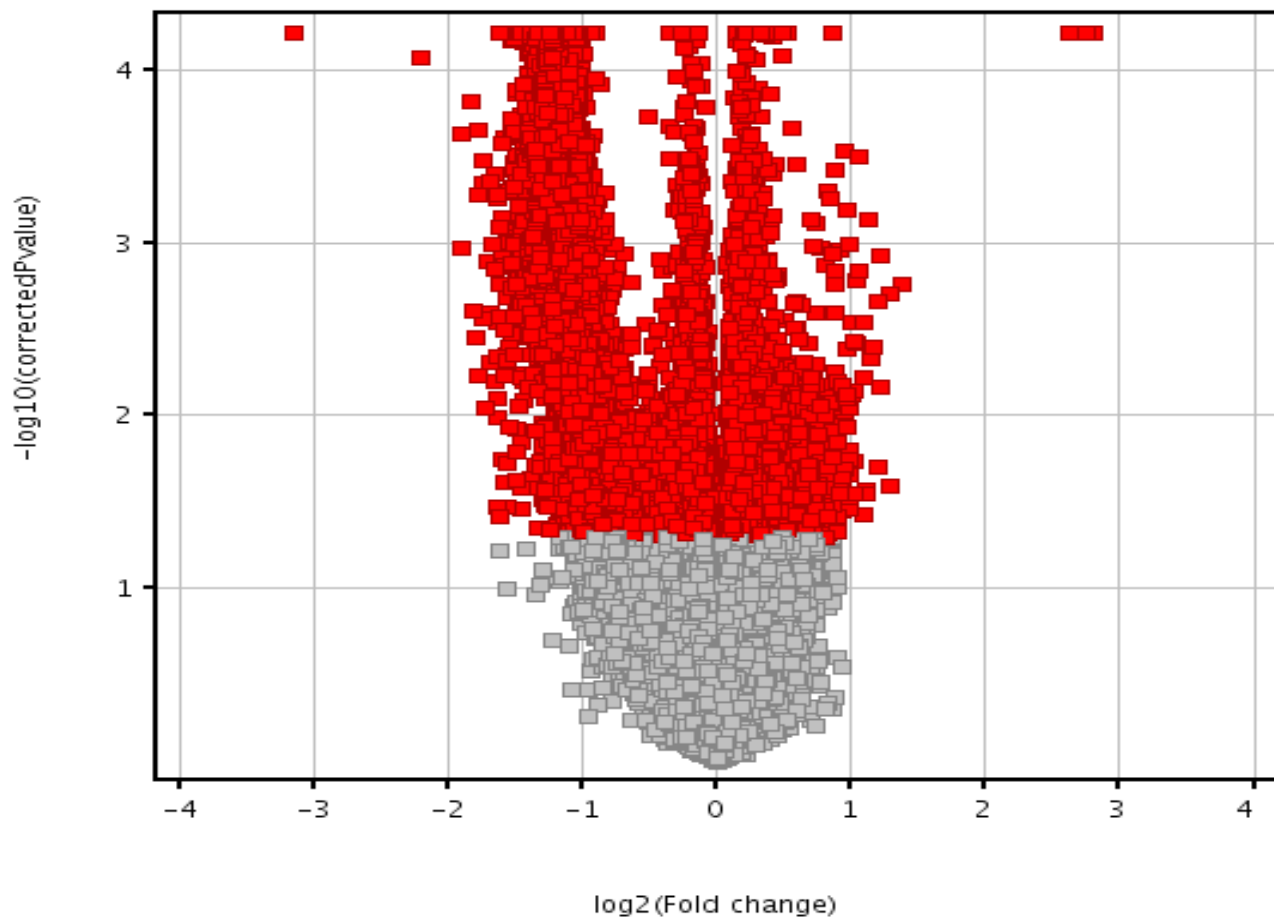

96 h

| Test Description                                |       |          |          |          |            |            |
|-------------------------------------------------|-------|----------|----------|----------|------------|------------|
| Selected Test : T Test Against Zero             |       |          |          |          |            |            |
| p-value computation: Asymptotic                 |       |          |          |          |            |            |
| Multiple Testing Correction: Benjamini-Hochberg |       |          |          |          |            |            |
| Result Summary                                  |       |          |          |          |            |            |
|                                                 | P all | P < 0.05 | P < 0.02 | P < 0.01 | P < 0.0050 | P < 0.0010 |
| FC all                                          | 37538 | 8124     | 6555     | 5751     | 5058       | 0          |
| FC > 1.1                                        | 21772 | 7853     | 6446     | 5699     | 5037       | 0          |
| FC > 1.5                                        | 9940  | 6966     | 6042     | 5458     | 4918       | 0          |
| FC > 2.0                                        | 5991  | 5662     | 5350     | 4996     | 4613       | 0          |
| FC > 3.0                                        | 61    | 43       | 34       | 25       | 15         | 0          |
| Expected by ch...                               |       | 406      | 131      | 57       | 25         | 0          |

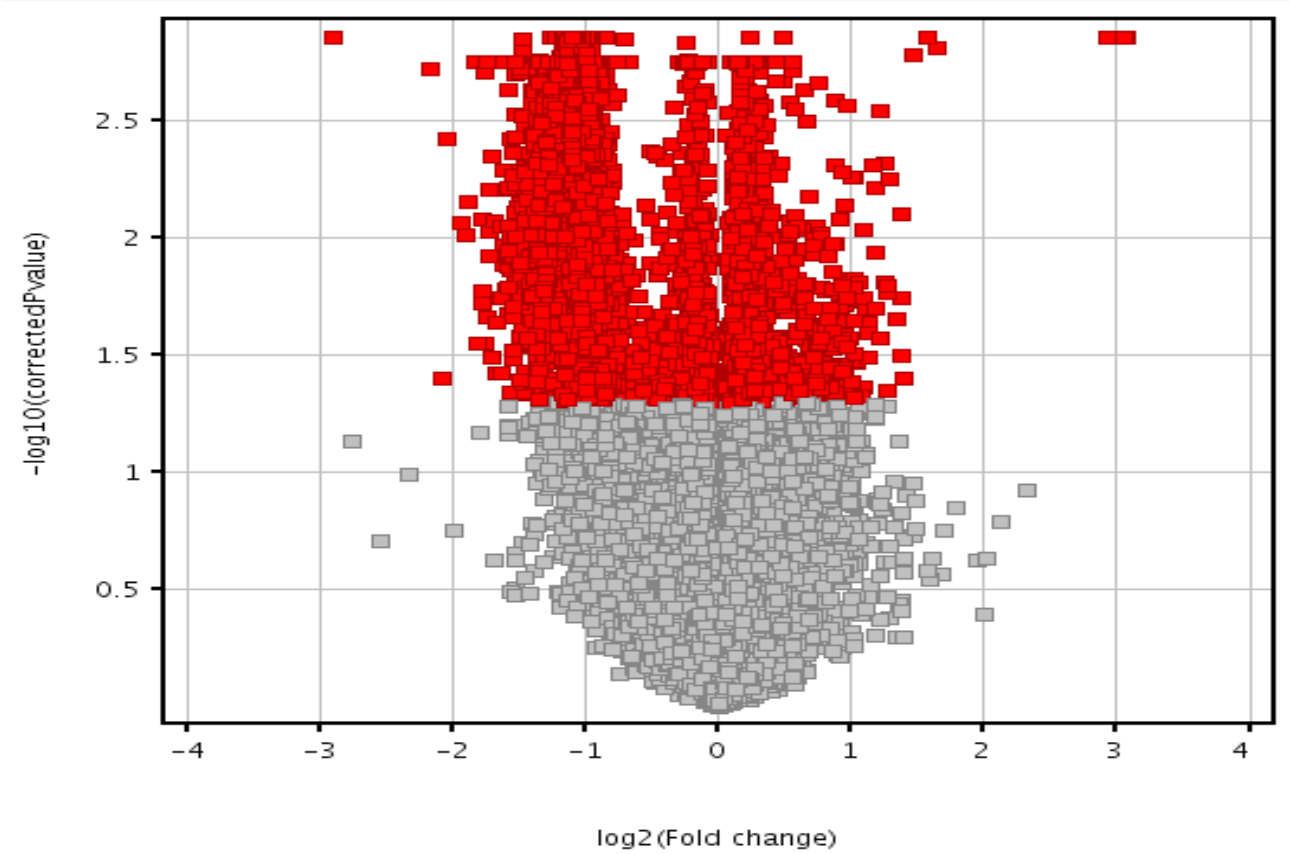

# GeneSpring analysis of gene expression from a time course analysis of *Arabidopsis thaliana* seedlings exposed to GMF (control) and NNMF.

| Specification                                                                         | Time-course point |                 |                 |                 |                |                 |                |
|---------------------------------------------------------------------------------------|-------------------|-----------------|-----------------|-----------------|----------------|-----------------|----------------|
|                                                                                       | 10 min            | 1 h             | 2 h             | 4 h             | 24 h           | 48 h            | 96 h           |
| Number of Biological replicates retained in the analysis (total number)               | 10 (12)           | 7 (8)           | 8 (8)           | 8 (8)           | 7 (8)          | 8 (8)           | 6 (8)          |
| Number of genes satisfying a corrected P-value cut-off of 0.05 (% out of 37538 genes) | 10,811<br>(29%)   | 10,321<br>(27%) | 10,876<br>(29%) | 11,135<br>(30%) | 7,984<br>(21%) | 10,963<br>(29%) | 8,124<br>(22%) |
| Number of genes with FC > 2 and P < 0.05 (% out of satisfying genes)                  | 3,591<br>(33%)    | 6,653<br>(64%)  | 6,248<br>(57%)  | 2,018<br>(18%)  | 4,104<br>(51%) | 6,522<br>(59%)  | 5,662<br>(70%) |
| Number of genes with FC > 3 and P < 0.05                                              | 136               | 25              | 19              | 16              | 11             | 48              | 43             |
