# Supplementary material for: Transcriptomics and Metabolomics of Reactive Oxygen Species Modulation in Near-Null Magnetic Field-Induced Arabidopsis thaliana
Source: Biomolecules. 2022 Dec 6;12(12):1824. doi: 10.3390/biom12121824 (PMC9775259; doi:10.3390/biom12121824)
Supplement: Supplementary file 1 [file biomolecules-12-01824-s001.zip]

Archive with 8 entries (8 files):
- Supplementary Dataset S1.pdf
- Supplementary Table S1.pdf
- Supplementary Table S2.xlsx
- Supplementary Table S3.xlsx
- Supplementary Table S4.xlsx
- Supplementary Table S5.xlsx
- Supplementary Table S6.xlsx
- Supplementray Table S7.xlsx
