# Supplementary material for: Transcriptomics and Metabolomics of Reactive Oxygen Species Modulation in Near-Null Magnetic Field-Induced Arabidopsis thaliana
Source: Biomolecules. 2022 Dec 6;12(12):1824. doi: 10.3390/biom12121824 (PMC9775259; doi:10.3390/biom12121824)
Supplement: Supplementary file 1 [file biomolecules-12-01824-s001.zip › Supplementary Table S2.xlsx]

## Sheet: Arabidopisis NNMF vs GMF
SUPPLEMENTARY TABLE S2 - Expression of roots and shoots genes filtered for their involvement in oxidative reactions
						ROOTS							SHOOTS
Cluster	Row	Gene	Subcellular prediction	Gene code	Gene function	10 min	1 h	2 h	4 h	24 h	48 h	96 h	10 min	1 h	2 h	4 h	24 h	48 h	96 h
	1	At1g01980.1	Chloroplast	OGOX4, OLIGOGALACTURONIDE OXIDASE 4	FAD-binding domain-containing protein	2.34 ± 0.31	2.07 ± 0.46	2.06 ± 0.2	2.22 ± 0.3	1.58 ± 0.64	2.28 ± 1.43	1.73 ± 0.33	1.39 ± 0.2	2.05 ± 0.04	1.56 ± 0.32	1.89 ± 0.07	0.69 ± 0.19	0.34 ± 0.07	0.4 ± 0.13
	2	At1g02590.1	Cytoplasm	Aldehyde oxidase/xanthine dehydrogenase	iron ion binding, oxidoreductase activity	1.69 ± 0.32	1.24 ± 0.59	1.06 ± 0.12	1.11 ± 0.08	1.24 ± 0.29	1.17 ± 0.28	0.66 ± 0.26	1.25 ± 0.16	0.87 ± 0.37	0.6 ± 0.12	0.98 ± 0.15	1.32 ± 1.31	1.41 ± 0.93	0.95 ± 0.35
	3	At1g03990.1	Unknown	Long-chain fatty alcohol dehydrogenase family protein	FAD-binding domain-containing protein	0.62 ± 0.1	0.63 ± 0.22	1.26 ± 0.2	1.64 ± 0.46	1.12 ± 0.18	0.84 ± 0.21	1.18 ± 0.24	0.34 ± 0.07	0.97 ± 0.12	1.03 ± 0.22	0.64 ± 0.14	0.96 ± 0.24	1.22 ± 0.26	1.08 ± 0.78
	4	At1g04580.1	Cytoplasm	AAO4, ALDEHYDE OXIDASE 2	FAD-binding domain-containing protein	1.01 ± 0.14	1.68 ± 0.3	1.83 ± 0.63	2.09 ± 1.01	0.96 ± 0.28	1.44 ± 0.56	0.79 ± 0.17	1.29 ± 0.26	2.25 ± 0.28	2.17 ± 0.35	2.05 ± 0.14	1.31 ± 0.48	0.99 ± 0.55	0.61 ± 0.06
A	5	At1g05240.1	Extracellular	PRX01, PATHOGENESIS RELATED 9, PR9,	peroxidase family protein	1.17 ± 0.22	1.19 ± 0.04	0.97 ± 0.05	0.95 ± 0.21	1.13 ± 0.11	0.97 ± 0.19	1.01 ± 0.25	0.61 ± 0.08	2.02 ± 0.87	1.06 ± 0.67	1.86 ± 1.34	0.92 ± 0.22	1.44 ± 0.18	2.32 ± 0.75
A	6	At1g05250.1	Extracellular	PRX2, ATPRX1, PEROXIDASE 2	peroxidase family protein	0.95 ± 0.17	1.07 ± 0.03	0.89 ± 0.05	0.86 ± 0.21	1.01 ± 0.13	0.83 ± 0.16	0.98 ± 0.28	0.58 ± 0.07	1.79 ± 1.32	0.99 ± 0.75	2.83 ± 1.93	0.67 ± 0.17	1.23 ± 0.19	2.18 ± 0.56
A	7	At1g05260.1	Extracellular	PER3, PEROXIDASE 3	peroxidase family protein	1.15 ± 0.06	1.21 ± 0.15	1.16 ± 0.06	1.19 ± 0.05	1.2 ± 0.01	1.09 ± 0.11	1.21 ± 0.15	1.2 ± 0.14	1.26 ± 0.24	1.17 ± 0.1	1.09 ± 0.17	0.9 ± 0.21	1.37 ± 0.18	1.51 ± 0.31
C	8	At1g07890.1	Chloroplast	APX1, ASCORBATE PEROXIDASE 1	L-ascorbate peroxidase activity, heme binding, p-coumarate 3-hydroxylase activity, peroxidase activity,	1.01 ± 0.11	1.03 ± 0.05	0.92 ± 0.05	0.93 ± 0.06	1 ± 0.08	0.92 ± 0.06	0.94 ± 0.04	1.08 ± 0.06	1.02 ± 0.02	0.84 ± 0.18	1.01 ± 0.13	1.21 ± 0.19	0.98 ± 0.13	0.99 ± 0.18
C	9	At1g08830.1	Cytoplasm	SOD1, COPPER/ZINC SUPEROXIDE DISMUTASE 1	superoxide dismutase [Cu-Zn] (SODCC) / copper/zinc superoxide dismutase (CSD1) identical to SWISS-PROT: P24704 [At1g08830.1]	1.06 ± 0.12	1.11 ± 0.11	1.09 ± 0.06	1.04 ± 0.19	1.01 ± 0.13	1.01 ± 0.06	0.94 ± 0.05	0.92 ± 0.05	1.08 ± 0.19	0.97 ± 0.16	0.97 ± 0.49	1.23 ± 0.25	0.92 ± 0.01	0.96 ± 0.31
B	10	At1g11770.1	Chloroplast	OGOX3, OLIGOGALACTURONIDE OXIDASE 3	FAD-binding domain-containing protein	2.38 ± 0.31	1.88 ± 0.13	2.14 ± 0.2	2.2 ± 0.41	1.9 ± 0.18	2.02 ± 0.33	1.91 ± 0.13	2.71 ± 0.69	2.13 ± 0.13	2.44 ± 0.45	1.98 ± 0.14	2.19 ± 0.6	2.64 ± 0.5	2.36 ± 0.39
C	11	At1g12520.1	Chloroplast	CCS, COPPER CHAPERONE FOR SOD1	copper ion binding, superoxide dismutase copper chaperone activity	0.99 ± 0.09	1.06 ± 0.15	1.01 ± 0.07	0.97 ± 0.09	0.97 ± 0.12	0.96 ± 0.03	1.05 ± 0.22	0.95 ± 0.06	0.96 ± 0.04	0.93 ± 0.08	0.94 ± 0.51	1.17 ± 0.24	0.96 ± 0.07	0.8 ± 0.36
	12	At1g12570.1	Extracellular	IPE1 ortholog	FAD-binding domain-containing protein	1.15 ± 0.22	0.7 ± 0.13	1.38 ± 0.41	0.98 ± 0.11	1.83 ± 0.56	1.32 ± 0.79	2.06 ± 2.01	1.09 ± 0.06	0.94 ± 0.14	1.07 ± 0.04	0.84 ± 0.46	0.9 ± 0.19	1.15 ± 0.04	1.3 ± 0.33
B	13	At1g14430.1	Extracellular	GOXL5, GALACTOSE OXIDASE-LIKE 5	glyoxal oxidase-related	2.36 ± 0.29	2.39 ± 0.81	2.19 ± 0.22	2.24 ± 0.3	1.87 ± 0.2	2.04 ± 0.37	1.9 ± 0.14	2.32 ± 0.26	2.14 ± 0.11	2.23 ± 0.34	2.05 ± 0.25	2.34 ± 0.59	2.66 ± 0.5	2.58 ± 0.5
	14	At1g14540.1	Extracellular	PER4, PEROXIDASE 4, PRX4	peroxidase family protein	1.18 ± 0.18	1.19 ± 0.22	1.04 ± 0.1	0.99 ± 0.18	0.88 ± 0.11	1.08 ± 0.25	0.8 ± 0.23	0.93 ± 0.11	0.97 ± 0.09	1.24 ± 0.31	1.3 ± 0.11	0.93 ± 0.14	0.98 ± 0.06	0.62 ± 0.5
	15	At1g14550.1	Extracellular	Peroxidase superfamily protein	peroxidase family protein	1.27 ± 0.12	1.41 ± 0.35	0.87 ± 0.04	0.92 ± 0.39	0.8 ± 0.15	1.06 ± 0.14	1.08 ± 0.3	0.36 ± 0.09	1.05 ± 0.07	1.55 ± 0.73	1.19 ± 0.6	1.15 ± 0.31	1.1 ± 0.19	0.67 ± 0.07
	16	At1g15020.1	Extracellular	QSOX1, QUIESCIN-SULFHYDRYL OXIDASE 1	flavin-linked sulfhydryl oxidase activity, protein disulfide isomerase activity, thiol oxidase activity	1.06 ± 0.1	1.04 ± 0.07	1.04 ± 0.08	1.16 ± 0.16	1.11 ± 0.1	1.12 ± 0.04	1.13 ± 0.04	1.12 ± 0.11	1 ± 0.11	1.17 ± 0.08	1.05 ± 0.08	1.03 ± 0.11	1.11 ± 0.08	1.1 ± 0.09
	17	At1g15550.1	Cytoplasm	GA3OX1, GA4, GIBBERELLIN 3-OXIDASE 1	dioxygenase activity, gibberellin 3-beta-dioxygenase activity, protein binding, transcription factor binding	0.95 ± 0.07	1.07 ± 0.11	1.03 ± 0.16	0.89 ± 0.13	1.07 ± 0.1	0.97 ± 0.14	1.02 ± 0.1	1.34 ± 0.12	0.91 ± 0.06	1 ± 0.11	1.09 ± 0.3	1 ± 0.16	1.01 ± 0.2	0.95 ± 0.11
	18	At1g17010.1	Cytoplasm	2-oxoglutarate (2OG) and Fe(II)-dependent oxygenase	dioxygenase activity	0.43 ± 0.08	0.52 ± 0.44	1.44 ± 0.51	2.66 ± 0.94	1.25 ± 0.04	1.19 ± 0.07	0.65 ± 0.17	1.2 ± 0.11	1.83 ± 0.07	1.28 ± 0.23	0.7 ± 0.15	1.44 ± 0.89	1.3 ± 0.26	2.69 ± 1.52
E	19	At1g18490.1	Unknown	PCO3, PLANT CYSTEINE OXIDASE 3	cysteine dioxygenase activity, iron ion binding	0.89 ± 0.24	1.38 ± 0.33	1.62 ± 0.35	0.92 ± 0.18	1.32 ± 0.24	0.78 ± 0.07	1.01 ± 0.12	0.74 ± 0.12	0.75 ± 0.17	1.15 ± 0.58	1.27 ± 0.57	0.49 ± 0.1	1.01 ± 0.48	1.18 ± 0.25
A	20	At1g19900.1	Extracellular	RUBY, RUBY PARTICLES IN MUCILAGE	galactose oxidase activity	1 ± 0.1	0.98 ± 0.11	0.93 ± 0.1	0.96 ± 0.12	1.51 ± 0.84	0.67 ± 0.43	0.75 ± 0.06	1.05 ± 0.41	0.62 ± 0.22	1.02 ± 0.26	2.49 ± 1.32	0.55 ± 0.37	0.92 ± 0.08	0.65 ± 0.21
	21	At1g20630.1	Cytoplasm	CAT1, CATALASE 1	catalase activity, cobalt ion binding, heme binding, protein binding	1.03 ± 0.12	0.86 ± 0.42	1.49 ± 0.38	0.76 ± 0.35	0.65 ± 0.19	0.85 ± 0.34	1.27 ± 0.64	1.01 ± 0.16	0.84 ± 0.28	1.38 ± 0.56	1.92 ± 0.41	0.84 ± 0.2	0.66 ± 0.14	0.76 ± 0.18
B	22	At1g21850.1	Extracellular	SKS8, SKU5 SIMILAR 8	copper ion binding, oxidoreductase activity	2.34 ± 0.29	1.87 ± 0.15	2.12 ± 0.19	2.09 ± 0.42	1.89 ± 0.2	1.98 ± 0.3	1.72 ± 0.27	2.35 ± 0.29	2.13 ± 0.13	2.27 ± 0.43	2.07 ± 0.27	2.21 ± 0.6	2.62 ± 0.44	2.53 ± 0.43
A	23	At1g21860.1	Extracellular	SKS7, SKU5 SIMILAR 7	copper ion binding, oxidoreductase activity	0.5 ± 0.1	1.78 ± 0.43	0.86 ± 0.44	0.63 ± 0.11	0.79 ± 0.44	0.94 ± 0.6	0.92 ± 0.19	2.11 ± 0.34	2.5 ± 0.77	0.98 ± 0.69	2.12 ± 0.24	1.84 ± 0.31	3.62 ± 2.64	1.98 ± 0.25
B	24	At1g24110.1	Extracellular	Peroxidase superfamily protein	peroxidase family protein	2.46 ± 0.39	2.14 ± 0.57	2.19 ± 0.21	2.26 ± 0.34	1.76 ± 0.42	1.86 ± 0.37	1.84 ± 0.26	2.41 ± 0.36	2.04 ± 0.27	2.2 ± 0.48	1.5 ± 0.28	2.29 ± 0.78	2.23 ± 0.46	2.36 ± 0.38
	25	At1g25460.1	Unknown	NAD(P)-binding Rossmann-fold superfamily protein	oxidoreductase activity, acting on the CH-OH group of donors, NAD or NADP as acceptor	1.1 ± 0.11	1.2 ± 0.16	1.19 ± 0.12	1.17 ± 0.08	1.02 ± 0.12	0.95 ± 0.15	1 ± 0.09	1.22 ± 0.3	0.81 ± 0.17	0.69 ± 0.2	0.76 ± 0.39	0.98 ± 0.1	0.83 ± 0.07	0.87 ± 0.23
	26	At1g26380.1	Cytoplasm	ATBBE3, FOX1, FAD-LINKED OXIDOREDUCTASE 1	FAD-binding domain-containing protein	1.21 ± 0.23	1.18 ± 0.91	0.57 ± 0.3	0.85 ± 0.06	0.76 ± 0.2	1.07 ± 0.23	0.53 ± 0.06	0.23 ± 0.03	1.11 ± 0.44	0.35 ± 0.14	0.52 ± 0.25	3.13 ± 3.4	1.63 ± 0.22	0.34 ± 0.31
C	27	At1g26390.1	Cytoplasm	ATBBE4 FAD-binding Berberine family protein	FAD-binding domain-containing protein	2.06 ± 0.56	1.8 ± 1.49	1.21 ± 0.99	0.58 ± 0.27	0.77 ± 0.09	1.49 ± 0.69	0.83 ± 0.45	3.22 ± 1.39	2.4 ± 0.55	1.22 ± 0.56	1.84 ± 1.19	6.89 ± 4.9	1.26 ± 0.71	0.52 ± 0.64
C	28	At1g26400.1	Cell wall	ATBBE5 FAD-binding Berberine family protein	FAD-binding domain-containing protein	3.33 ± 3.79	2.44 ± 0.62	2.05 ± 0.45	2.36 ± 0.74	1.98 ± 0.22	2.17 ± 0.35	2.07 ± 0.13	6.37 ± 4.38	2.01 ± 0.24	2.21 ± 0.33	1.88 ± 2.12	2.65 ± 1.14	1.45 ± 1.22	1.79 ± 1.21
C	29	At1g26410.1	Cytoplasm	ATBBE6 FAD-binding Berberine family protein	FAD-binding domain-containing protein	0.29 ± 0.1	1.46 ± 1.02	0.87 ± 0.52	0.81 ± 0.18	0.6 ± 0.05	1.44 ± 0.18	1.22 ± 1.22	0.59 ± 0.12	1.72 ± 0.15	0.73 ± 0.5	0.6 ± 0.31	2.85 ± 3.47	0.55 ± 0.13	0.32 ± 0.26
B	30	At1g28030.1	Cytoplasm	2-oxoglutarate (2OG) and Fe(II)-dependent oxygenase	dioxygenase activity	2.33 ± 0.38	1.89 ± 0.13	2.16 ± 0.2	1.81 ± 0.77	1.93 ± 0.24	2.01 ± 0.31	1.9 ± 0.13	2.32 ± 0.37	2.1 ± 0.03	2.06 ± 0.44	2.1 ± 0.29	1.99 ± 0.51	2.22 ± 0.23	2.6 ± 0.53
	31	At1g30700.1	Chloroplast	ATBBE8 FAD-binding Berberine family protein	FAD-binding domain-containing protein	0.91 ± 0.11	0.97 ± 0.13	0.94 ± 0.11	0.95 ± 0.13	0.98 ± 0.28	0.99 ± 0.11	0.94 ± 0.07	0.91 ± 0.07	1.05 ± 0.24	1.08 ± 0.07	0.98 ± 0.3	0.74 ± 0.25	1.03 ± 0.13	0.97 ± 0.47
	32	At1g30710.1	Chloroplast	ATBBE9 FAD-binding Berberine family protein	FAD-binding domain-containing protein	2 ± 0.26	2.97 ± 0.45	3.3 ± 0.87	2.28 ± 0.28	1.9 ± 0.22	2.15 ± 0.42	1.88 ± 0.13	2.16 ± 0.35	2.12 ± 0.13	2.24 ± 0.36	2.02 ± 0.28	2.51 ± 0.26	2.39 ± 0.24	2.85 ± 0.15
	33	At1g30720.1	Chloroplast	ATBBE10 FAD-binding Berberine family protein	FAD-binding domain-containing protein	0.96 ± 0.12	0.9 ± 0.25	1.04 ± 0.21	1.19 ± 0.11	0.86 ± 0.16	0.85 ± 0.41	0.98 ± 0.11	0.8 ± 0.1	1.1 ± 0.26	1.01 ± 0.09	1.18 ± 0.17	1.21 ± 0.83	0.75 ± 0.12	0.68 ± 0.2
	34	At1g30730.1	Cytoplasm	ATBBE11 FAD-binding Berberine family protein	FAD-binding domain-containing protein	1.1 ± 0.1	1.1 ± 0.25	1.19 ± 0.32	1.01 ± 0.12	0.93 ± 0.15	1.01 ± 0.22	0.86 ± 0.1	0.8 ± 0.18	0.74 ± 0.26	0.89 ± 0.22	1.08 ± 0.31	1.19 ± 0.75	0.79 ± 0.18	0.66 ± 0.08
E	35	At1g30740.1	Chloroplast	ATBBE12 FAD-binding Berberine family protein	FAD-binding domain-containing protein	2.4 ± 0.37	1.75 ± 0.3	2.15 ± 0.21	2.27 ± 0.31	1.87 ± 0.18	2.01 ± 0.34	1.75 ± 0.39	2.19 ± 0.39	2.12 ± 0.12	2.24 ± 0.33	1.89 ± 0.03	1.62 ± 0.09	2.66 ± 0.53	1.43 ± 0.33
	36	At1g30760.1	Cytoplasm	ATBBE-LIKE 13, BERBERINE BRIDGE ENZYME-LIKE 13	FAD-binding domain-containing protein	1.23 ± 0.06	1.29 ± 0.13	1.11 ± 0.21	1.23 ± 0.17	1.26 ± 0.22	0.96 ± 0.16	1.03 ± 0.09	0.71 ± 0.14	0.88 ± 0.22	0.82 ± 0.18	1.14 ± 0.18	1.12 ± 0.54	1.08 ± 0.19	1.15 ± 0.1
A	37	At1g30870.1	Extracellular	PER7, PEROXIDASE7	peroxidase family protein	1.02 ± 0.19	1.02 ± 0.07	0.93 ± 0.05	0.91 ± 0.19	1.27 ± 0.2	0.95 ± 0.24	1.02 ± 0.16	0.54 ± 0.1	1.1 ± 0.69	1.03 ± 0.73	2.07 ± 1.07	0.67 ± 0.08	2.26 ± 2.1	1.2 ± 0.14
	38	At1g31670.1	Extracellular	Copper amine oxidase family protein	aminoacetone:oxygen oxidoreductase(deaminating) activity, copper ion binding,	2.5 ± 0.7	1.9 ± 0.14	1.89 ± 0.59	3.38 ± 1.02	1.55 ± 0.17	2.03 ± 0.38	1.97 ± 0.1	2.29 ± 0.2	2.31 ± 0.45	2.24 ± 0.34	2.39 ± 0.48	3.64 ± 2.75	1.42 ± 1.15	2.03 ± 0.91
	39	At1g31690.1	Chloroplast	COPPER AMINE OXIDASE ALPHA 2, CUAOALPHA2	aliphatic amine oxidase activity, aminoacetone:oxygen oxidoreductase(deaminating) activity, copper ion binding,	0.67 ± 0.25	2.44 ± 0.57	1.84 ± 0.31	0.87 ± 0.23	1.48 ± 0.2	2.09 ± 1.12	1.6 ± 0.48	0.86 ± 0.08	0.52 ± 0.13	1.4 ± 1.1	0.82 ± 0.16	0.66 ± 0.19	1.32 ± 0.1	1.84 ± 0.96
B	40	At1g32300.1	Extracellular	GULLO1, L -GULONO-1,4-LACTONE ( L -GULL) OXIDASE 1	FAD-binding domain-containing protein	3.05 ± 0.84	2.15 ± 0.45	2.15 ± 0.19	2.34 ± 0.37	1.81 ± 0.36	2.04 ± 0.34	1.96 ± 0.09	2.2 ± 0.32	2.2 ± 0.13	2.25 ± 0.35	2.06 ± 0.28	2.2 ± 0.56	2.7 ± 0.52	3.01 ± 1.26
D	41	At1g32350.1	Mitochondrion	AOX1D, ALTERNATIVE OXIDASE 1D	alternative oxidase activity, superoxide-generating NADPH oxidase activity, ubiquinol:oxygen oxidoreductase activity	1.04 ± 0.23	0.74 ± 0.12	0.97 ± 0.2	0.73 ± 0.17	1.02 ± 0.14	0.99 ± 0.2	0.85 ± 0.19	0.98 ± 0.13	0.9 ± 0.14	0.88 ± 0.06	0.76 ± 0.13	0.83 ± 0.25	1.66 ± 0.66	0.92 ± 0.06
B	42	At1g32710.1	Mitochondrion	Cytochrome c oxidase, subunit Vib family protein	cytochrome c oxidase subunit VIb family contains similarity to subunit 6b of cytochrome c oxidase [Arabidopsis thaliana] GI:6518353; contains Pfam profile PF02297: Cytochrome oxidase c subunit VIb [At1g32710.1]	2.51 ± 0.35	1.98 ± 0.12	2.28 ± 0.27	2.03 ± 0.28	2.02 ± 0.2	2.13 ± 0.42	2.03 ± 0.11	2.31 ± 0.33	2.19 ± 0.14	2.47 ± 0.33	2.13 ± 0.31	2.26 ± 0.53	2.6 ± 0.58	2.94 ± 0.35
A	43	At1g33660.1	Unknown	peroxidase family protein	peroxidase family protein	0.6 ± 0.1	0.56 ± 0.18	0.6 ± 0.25	0.73 ± 0.09	0.85 ± 0.17	0.4 ± 0.09	0.53 ± 0.13	0.55 ± 0.12	0.84 ± 0.05	1.2 ± 0.11	0.92 ± 0.33	1.27 ± 0.35	0.83 ± 0.11	0.78 ± 0.22
A	44	At1g34510.1	Extracellular	peroxidase family protein	peroxidase family protein	1.16 ± 0.18	0.9 ± 0.08	1.04 ± 0.23	1.13 ± 0.08	1.53 ± 1.17	0.6 ± 0.49	1.23 ± 0.49	0.67 ± 0.12	3.28 ± 2.67	1.27 ± 0.58	2.42 ± 2.35	0.57 ± 0.29	1.93 ± 0.34	2.67 ± 0.79
	45	At1g34575.1	Chloroplast	ATBBE14 FAD-binding Berberine family protein	FAD-binding domain-containing protein	2.48 ± 0.31	2.2 ± 0.13	2.07 ± 0.16	1.69 ± 0.39	2.08 ± 0.49	2.02 ± 0.33	1.39 ± 0.5	4.33 ± 0.33	2.13 ± 0.13	2.17 ± 0.37	1.91 ± 0.06	1.24 ± 0.4	1.57 ± 1	2.02 ± 0.44
	46	At1g48130.1	Nucleus	PER1, 1-CYSTEINE PEROXIREDOXIN 1	peroxidase family protein	0.36 ± 0.08	0.98 ± 0.56	1.65 ± 0.97	2.26 ± 0.77	1.27 ± 0.5	1.04 ± 0.31	0.73 ± 0.11	0.46 ± 0.05	1.23 ± 0.33	1.58 ± 0.67	0.77 ± 0.1	0.96 ± 0.79	1.36 ± 0.34	4.55 ± 2.88
A	47	At1g48700.1	Mitochondrion	CP5, CUPULIFORMIS5	oxidoreductase, 2OG-Fe(II) oxygenase	0.69 ± 0.06	0.61 ± 0.3	0.64 ± 0.32	0.82 ± 0.12	1.03 ± 0.19	0.38 ± 0.09	1.15 ± 0.83	2.01 ± 0.33	1.87 ± 0.39	2.22 ± 0.4	1.9 ± 0.09	3.45 ± 0.96	2.2 ± 0.44	1.94 ± 0.77
A	48	At1g49390.1	Cytoplasm	2-oxoglutarate (2OG) and Fe(II)-dependent oxygenase	dioxygenase activity	0.96 ± 0.09	1.03 ± 0.11	0.93 ± 0.05	1.01 ± 0.1	0.88 ± 0.11	0.89 ± 0.06	1.03 ± 0.13	1.07 ± 0.16	1.19 ± 0.25	0.86 ± 0.22	1.17 ± 0.32	0.66 ± 0.25	1.09 ± 0.16	1.47 ± 1.04
A	49	At1g49570.1	Extracellular	peroxidase family protein	peroxidase family protein	0.72 ± 0.14	0.82 ± 0.13	1.03 ± 0.14	0.73 ± 0.22	0.99 ± 0.32	0.92 ± 0.21	0.57 ± 0.48	0.72 ± 0.13	0.86 ± 0.45	0.37 ± 0.27	1.69 ± 0.78	0.96 ± 0.06	2.14 ± 1.31	0.9 ± 0.55
	50	At1g50780.1	Unknown	2Fe-2S ferredoxin-like superfamily protein	DNA-binding transcription factor activity, RNA polymerase II-specific	2.53 ± 0.51	2.2 ± 0.43	2.2 ± 0.21	1.41 ± 0.21	1.91 ± 0.17	2.05 ± 0.34	2.11 ± 0.27	2.18 ± 0.42	2.18 ± 0.14	2.09 ± 0.15	2.11 ± 0.32	2.17 ± 0.56	1.71 ± 0.47	1.56 ± 0.26
D	51	At1g50960.1	Chloroplast	GA2OX7, GIBBERELLIN 2-OXIDASE 7	C-20 gibberellin 2-beta-dioxygenase activity, dioxygenase activity, protein binding	0.84 ± 0.16	0.78 ± 0.28	0.68 ± 0.07	1.36 ± 0.44	0.72 ± 0.11	1.1 ± 0.27	1.13 ± 0.67	1.33 ± 0.36	1.31 ± 0.58	1.12 ± 0.41	0.71 ± 0.28	0.68 ± 0.17	1.52 ± 1.59	1.14 ± 0.58
B	52	At1g52790.1	Cytoplasm	2-oxoglutarate (2OG) and Fe(II)-dependent oxygenase	dioxygenase activity	2.53 ± 0.32	2 ± 0.13	2.22 ± 0.3	1.83 ± 0.29	1.82 ± 0.32	2.21 ± 0.35	1 ± 0.5	2.14 ± 0.14	2.25 ± 0.18	2.29 ± 0.31	2.12 ± 0.32	2.46 ± 0.52	2.36 ± 0.17	2.46 ± 0.45
	53	At1g52800.1	Cytoplasm	2-oxoglutarate (2OG) and Fe(II)-dependent oxygenase	dioxygenase activity	0.79 ± 0.13	2.16 ± 0.52	1.29 ± 0.37	0.65 ± 0.18	1.56 ± 0.57	1.51 ± 0.18	0.84 ± 0.14	1.13 ± 0.11	0.73 ± 0.14	0.67 ± 0.05	0.63 ± 0.21	0.56 ± 0.04	0.42 ± 0.1	0.42 ± 0.1
	54	At1g52810.1	Cytoplasm	2-oxoglutarate (2OG) and Fe(II)-dependent oxygenase	dioxygenase activity	2.39 ± 0.32	1.85 ± 0.18	1.94 ± 0.49	2.11 ± 0.52	1.9 ± 0.28	1 ± 0.1	1.93 ± 0.11	1.24 ± 0.08	2.15 ± 0.13	2.2 ± 0.43	2.07 ± 0.24	1.93 ± 0.58	2.44 ± 0.24	2.44 ± 0.24
A	55	At1g55290.1	Cytoplasm	2-oxoglutarate (2OG) and Fe(II)-dependent oxygenase. F6'H2	dioxygenase activity	1.33 ± 0.13	1.13 ± 0.04	0.99 ± 0.1	1.15 ± 0.07	1.39 ± 0.21	0.88 ± 0.48	1.23 ± 0.14	0.5 ± 0.03	1.38 ± 0.85	1.25 ± 0.25	2.17 ± 1.33	1.15 ± 0.26	2.4 ± 2.07	0.78 ± 0.2
	56	At1g55560.1	Extracellular	SKS14, SKU5 SIMILAR 14	copper ion binding, oxidoreductase activity	2.24 ± 0.6	2.67 ± 0.61	2.11 ± 0.22	1.07 ± 0.58	1.02 ± 0.13	1.91 ± 1.18	1.99 ± 0.29	1.17 ± 0.16	2.01 ± 0.03	1.51 ± 0.1	2.2 ± 0.53	2.4 ± 0.39	1.84 ± 0.88	1.93 ± 0.76
B	57	At1g55570.1	Extracellular	SKS12, SKU5 SIMILAR 12	copper ion binding, oxidoreductase activity	2.7 ± 0.49	1.99 ± 0.11	2.24 ± 0.21	1.92 ± 0.23	2.13 ± 0.2	2.13 ± 0.35	2.04 ± 0.11	2.05 ± 0.92	2.2 ± 0.18	2.45 ± 0.61	1.87 ± 0.17	2.51 ± 0.47	2.76 ± 1.93	3.35 ± 1.75
	58	At1g60740.1	Cytoplasm	PEROXIREDOXIN IID, PRXIID	peroxidase family protein	1.1 ± 0.12	1.19 ± 0.16	0.95 ± 0.05	0.89 ± 0.06	1.03 ± 0.16	0.86 ± 0.13	0.9 ± 0.13	1.28 ± 0.15	0.91 ± 0.21	1.23 ± 0.15	1.09 ± 0.48	0.57 ± 0.27	1.34 ± 0.55	0.72 ± 0.19
B	59	At1g60980.1	Cytoplasm	GA20OX4, GIBBERELLIN 20-OXIDASE 4	dioxygenase activity, gibberellin 20-oxidase activity	2.36 ± 0.29	2.11 ± 0.49	2.13 ± 0.2	1.94 ± 0.29	1.9 ± 0.19	2.01 ± 0.38	1.88 ± 0.13	2.21 ± 0.39	2.13 ± 0.13	2.26 ± 0.42	2.08 ± 0.27	2.21 ± 0.6	2.86 ± 0.44	2.54 ± 0.44
	60	At1g65970.1	Cytoplasm	PEROXIREDOXIN IIC, PRXIIC	peroxidase family protein	1.04 ± 0.19	0.9 ± 0.18	1 ± 0.15	1.4 ± 0.08	0.93 ± 0.16	0.83 ± 0.15	0.88 ± 0.16	1.12 ± 0.19	0.83 ± 0.12	1.35 ± 0.29	1.53 ± 0.23	1.13 ± 0.91	1.32 ± 0.65	0.99 ± 0.73
B	61	At1g65990.1	Cytoplasm	PEROXIREDOXIN IIA, PRXIIA	peroxidase family protein	2.21 ± 0.04	2.4 ± 0.81	2.2 ± 0.21	2.1 ± 0.53	1.85 ± 0.2	1.81 ± 0.16	1.83 ± 0.12	2.02 ± 0.21	2.13 ± 0.13	2.25 ± 0.35	2.03 ± 0.28	2.17 ± 0.58	2.62 ± 0.5	2.64 ± 0.1
A	62	At1g67270.1	Nucleus	Zinc-finger domain of monoamine-oxidase A repressor R1 protein	regulation of DNA-templated transcription	0.96 ± 0.13	0.99 ± 0.08	0.93 ± 0.16	0.88 ± 0.31	0.92 ± 0.17	0.71 ± 0.09	0.7 ± 0.38	2.14 ± 0.33	2.21 ± 0.12	2.32 ± 0.41	2.11 ± 0.25	1.97 ± 0.54	1.69 ± 0.91	2.34 ± 0.78
E	63	At1g75450.1	Extracellular	CKX5, CYTOKININ OXIDASE 5	FAD-binding domain-containing protein	0.97 ± 0.08	1.03 ± 0.05	1.11 ± 0.15	1.02 ± 0.15	1.17 ± 0.1	1.02 ± 0.12	1.07 ± 0.17	0.93 ± 0.05	1 ± 0.11	1.02 ± 0.21	0.99 ± 0.15	0.73 ± 0.17	0.89 ± 0.12	0.98 ± 0.16
B	64	At1g75790.1	Extracellular	SKS18, SKU5 SIMILAR 18	copper ion binding, oxidoreductase activity	3.03 ± 1	1.91 ± 0.12	1.85 ± 0.29	1.61 ± 0.49	2.03 ± 0.22	1.89 ± 0.09	2.28 ± 0.45	2.26 ± 0.38	2.27 ± 0.22	2.25 ± 0.51	2.09 ± 0.27	2 ± 0.86	2.89 ± 0.45	2.73 ± 0.68
	65	At1g77100.1	Extracellular	peroxidase family protein	peroxidase family protein	0.93 ± 0.12	1.61 ± 1.16	0.9 ± 0.65	1.59 ± 0.41	1.67 ± 0.41	1.35 ± 0.73	1.69 ± 0.31	0.55 ± 0.04	1.37 ± 0.28	2 ± 1.79	1 ± 0.52	1.29 ± 0.29	1.36 ± 0.69	1.31 ± 0.24
	66	At2g06960.1	Cytoplasm	2-oxoglutarate (2OG) and Fe(II)-dependent oxygenase. F6'H2	dioxygenase activity	2.02 ± 0.42	3.16 ± 0.66	2.2 ± 0.22	2.25 ± 0.6	2.49 ± 0.56	2.14 ± 0.43	2.01 ± 0.12	2.6 ± 0.39	2.23 ± 0.25	2.22 ± 0.4	2.14 ± 0.33	2.52 ± 0.36	2.7 ± 0.58	2.56 ± 0.68
	67	At2g07785.1	Unknown	NADH dehydrogenase family protein	NADH-ubiquinone oxidoreductase	0.68 ± 0.09	1.18 ± 0.1	0.82 ± 0.16	0.9 ± 0.24	0.76 ± 0.36	1.59 ± 0.8	0.97 ± 0.23	1.91 ± 1.88	0.88 ± 0.05	1.02 ± 0.17	1.34 ± 0.31	0.64 ± 0.45	1 ± 0.17	0.36 ± 0.06
	68	At2g18140.1	Extracellular	peroxidase family protein	peroxidase family protein	1.19 ± 0.23	1.96 ± 0.12	1 ± 0.39	1.56 ± 0.32	0.93 ± 0.18	1.3 ± 0.6	0.35 ± 0.12	1.44 ± 0.32	2.16 ± 0.13	2.12 ± 0.45	1.97 ± 0.41	2.21 ± 0.53	1.96 ± 0.74	2.22 ± 0.59
	69	At2g18150.1	Extracellular	peroxidase family protein	peroxidase family protein	1.24 ± 0.16	1.04 ± 0.09	1.04 ± 0.2	1.18 ± 0.27	1.09 ± 0.23	1.34 ± 0.29	0.88 ± 0.18	0.94 ± 0.19	0.87 ± 0.1	1.13 ± 0.49	0.95 ± 0.13	0.89 ± 0.13	1.26 ± 0.13	1.54 ± 0.3
	70	At2g19500.1	Extracellular	CKX2, CYTOKININ OXIDASE 2	FAD-binding domain-containing protein	1.31 ± 0.16	1.76 ± 0.63	0.87 ± 0.41	1.12 ± 0.32	1.59 ± 0.18	2.93 ± 0.74	1.6 ± 0.45	2.22 ± 0.2	2.09 ± 0.11	1.73 ± 0.81	2.19 ± 0.34	2.38 ± 1.54	2.47 ± 0.37	2.26 ± 0.34
C	71	At2g22650.1	Chloroplast	FAD-dependent oxidoreductase family protein	FAD-binding domain-containing protein	1.15 ± 0.1	1.14 ± 0.2	1.09 ± 0.13	0.96 ± 0.11	1.05 ± 0.05	1.14 ± 0.15	1.09 ± 0.07	1.01 ± 0.12	1.07 ± 0.21	1.08 ± 0.15	1.21 ± 0.07	1.47 ± 0.39	0.95 ± 0.08	1.08 ± 0.18
A	72	At2g23630.1	Extracellular	SKS16, SKU5 SIMILAR 16	copper ion binding, oxidoreductase activity	0.83 ± 0.04	0.82 ± 0.1	1 ± 0.05	0.94 ± 0.09	1.09 ± 0.19	0.98 ± 0.1	0.81 ± 0.01	0.44 ± 0.12	1.19 ± 0.19	0.85 ± 0.08	1.29 ± 1.17	0.69 ± 0.15	1.09 ± 0.14	1.59 ± 0.67
	73	At2g27150.1	Chloroplast	AAO3, ABSCISIC ALDEHYDE OXIDASE 3	FAD-binding domain-containing protein	1.01 ± 0.08	0.95 ± 0.05	1.02 ± 0.09	1.01 ± 0.16	1.01 ± 0.05	1.01 ± 0.05	1.05 ± 0.09	0.91 ± 0.1	1 ± 0.15	1.04 ± 0.07	1.08 ± 0.07	1.06 ± 0.17	0.92 ± 0.18	0.92 ± 0.09
C	74	At2g28190.1	Chloroplast	SOD2, SUPEROXIDE DISMUTASE 2	superoxide dismutase [Cu-Zn], chloroplast (SODCP) / copper/zinc superoxide dismutase	0.99 ± 0.09	1.02 ± 0.18	0.97 ± 0.06	1 ± 0.14	1.07 ± 0.1	0.97 ± 0.07	1.09 ± 0.21	0.94 ± 0.12	0.99 ± 0.1	0.91 ± 0.11	0.92 ± 0.54	1.41 ± 0.23	0.94 ± 0.08	0.82 ± 0.49
B	75	At2g34555.1	Cytoplasm	GA2OX3, GIBBERELLIN 2-OXIDASE 3	dioxygenase activity, gibberellin 20-oxidase activity	2.38 ± 0.42	2.18 ± 1.05	1.5 ± 0.25	1.05 ± 0.46	0.68 ± 0.26	0.99 ± 0.48	0.84 ± 0.6	1.41 ± 0.18	2.12 ± 0.12	2.17 ± 0.4	2 ± 0.29	2.17 ± 0.57	2.29 ± 0.3	2.11 ± 0.21
	76	At2g34790.1	Chloroplast	ATBBE15 FAD-binding Berberine family protein	FAD-binding domain-containing protein	0.98 ± 0.15	0.79 ± 0.18	1.15 ± 0.07	0.71 ± 0.14	1.65 ± 0.25	0.69 ± 0.17	1.16 ± 0.18	1.01 ± 0.17	0.96 ± 0.11	0.94 ± 0.14	0.91 ± 0.19	0.93 ± 0.09	1.09 ± 0.33	1.34 ± 0.12
	77	At2g34810.1	Cytoplasm	ATBBE16 FAD-binding Berberine family protein	FAD-binding domain-containing protein	1.37 ± 0.22	1.18 ± 0.16	1.24 ± 0.1	1.05 ± 0.16	1.21 ± 0.11	1.44 ± 0.16	1.55 ± 0.36	0.99 ± 0.08	1.04 ± 0.14	1.09 ± 0.05	0.94 ± 0.18	1.34 ± 0.22	1.21 ± 0.22	1.42 ± 0.43
	78	At2g35380.1	Unknown	peroxidase family protein	peroxidase family protein	1.14 ± 0.16	1.1 ± 0.06	1.05 ± 0.07	1.06 ± 0.09	1 ± 0.22	0.99 ± 0.19	1.2 ± 0.18	1.77 ± 0.25	0.88 ± 0.17	1.24 ± 0.13	0.6 ± 0.28	1.18 ± 1.14	1.65 ± 1	1.93 ± 0.53
D	79	At2g38240.1	Cytoplasm	AO4, JASMONATE-INDUCED OXYGENASE4	dioxygenase activity, jasmonic acid hydrolase	0.9 ± 0.12	0.99 ± 0.11	0.79 ± 0.28	1 ± 0.09	1.83 ± 0.79	0.87 ± 0.17	1.17 ± 0.2	0.61 ± 0.12	1.91 ± 0.89	0.64 ± 0.19	0.98 ± 0.7	0.38 ± 0.25	2.56 ± 2.12	1.08 ± 0.05
B	80	At2g38960.1	Endoplasmic reticulum	AERO2, ENDOPLASMIC RETICULUM OXIDOREDUCTINS 2	FAD-binding domain-containing protein	2.23 ± 0.08	1.86 ± 0.13	2.1 ± 0.17	2.07 ± 0.42	1.85 ± 0.28	2.18 ± 0.49	1.71 ± 0.13	2.33 ± 0.28	2.17 ± 0.12	2.36 ± 0.43	2.04 ± 0.27	2.19 ± 0.51	2.81 ± 0.44	2.55 ± 0.57
	81	At2g39040.1	Extracellular	peroxidase family protein	peroxidase family protein	1.01 ± 0.14	0.95 ± 0.1	0.99 ± 0.03	0.94 ± 0.1	0.94 ± 0.1	0.7 ± 0.39	0.78 ± 0.03	1.1 ± 0.26	0.72 ± 0.31	0.58 ± 0.53	1.44 ± 0.62	1.69 ± 1.94	1.66 ± 1.32	0.94 ± 0.17
	82	At2g41510.1	Extracellular	CKX1, CYTOKININ OXIDASE/DEHYDROGENASE 1	FAD-binding domain-containing protein	0.82 ± 0.14	0.9 ± 0.23	1.13 ± 0.09	1.02 ± 0.06	0.99 ± 0.4	1.35 ± 0.12	1.22 ± 0.15	0.98 ± 0.18	0.7 ± 0.2	0.64 ± 0.12	1.06 ± 0.2	0.71 ± 0.19	0.95 ± 0.11	1.13 ± 0.25
A	83	At2g43480.1	Extracellular	peroxidase family protein	peroxidase family protein	0.85 ± 0.18	0.91 ± 0.09	0.92 ± 0.02	0.82 ± 0.04	0.88 ± 0.14	0.93 ± 0.06	0.82 ± 0.05	1.06 ± 0.3	2.05 ± 0.04	1.75 ± 0.34	1.1 ± 0.26	0.55 ± 0.14	1.05 ± 0.18	2.09 ± 0.23
B	84	At2g44800.1	Cytoplasm	2-oxoglutarate (2OG) and Fe(II)-dependent oxygenase. F6'H2	dioxygenase activity	2.22 ± 0.41	2.15 ± 0.57	2.14 ± 0.19	2.09 ± 0.42	1.99 ± 0.24	1.93 ± 0.39	1.86 ± 0.11	2.2 ± 0.38	2.15 ± 0.13	2.28 ± 0.42	1.94 ± 0.43	2.19 ± 0.6	2.45 ± 0.32	2.57 ± 0.46
A	85	At2g46740.1	Extracellular	GULLO5, L -GULONO-1,4-LACTONE ( L -GULL) OXIDASE 5	FAD-binding domain-containing protein	1.01 ± 0.09	1.02 ± 0.19	1.02 ± 0.16	1.16 ± 0.05	1.05 ± 0.15	1.07 ± 0.05	1.06 ± 0.17	1.09 ± 0.2	1.04 ± 0.26	1.48 ± 0.38	1.55 ± 0.13	0.75 ± 0.47	1.61 ± 1.67	1.55 ± 0.44
	86	At2g46750.1	Extracellular	GULLO2, L -GULONO-1,4-LACTONE ( L -GULL) OXIDASE 2	FAD-binding domain-containing protein	1.17 ± 0.16	1.03 ± 0.29	1.11 ± 0.26	1.15 ± 0.12	1.23 ± 0.24	1.07 ± 0.18	1.04 ± 0.09	0.99 ± 0.19	0.71 ± 0.15	1.13 ± 0.13	1.39 ± 0.94	1.15 ± 1.01	1.3 ± 0.3	0.81 ± 0.16
	87	At2g46760.1	Chloroplast	GULLO6, L -GULONO-1,4-LACTONE ( L -GULL) OXIDASE 6	FAD-binding domain-containing protein	0.86 ± 0.12	0.88 ± 0.1	1 ± 0.15	0.83 ± 0.06	0.99 ± 0.14	0.78 ± 0.12	1.03 ± 0.12	0.76 ± 0.1	0.64 ± 0.24	0.91 ± 0.15	0.75 ± 0.07	0.89 ± 0.04	0.89 ± 0.22	0.94 ± 0.3
D	88	At2g48080.1	Nucleus	oxidoreductase, 2OG-Fe(II) oxygenase family protein, ALKBH10A	oxidoreductase, 2OG-Fe(II) oxygenase family protein	0.98 ± 0.14	1.06 ± 0.08	1 ± 0.1	1.27 ± 0.34	0.97 ± 0.19	1.18 ± 0.24	1.13 ± 0.11	0.88 ± 0.16	0.97 ± 0.36	0.87 ± 0.26	0.89 ± 0.24	0.89 ± 0.12	1.44 ± 0.24	0.99 ± 0.38
	89	At3g01190.1	Extracellular	peroxidase family protein	peroxidase family protein	1.13 ± 0.11	1.17 ± 0.06	1.14 ± 0.13	1.18 ± 0.12	1.21 ± 0.2	1.11 ± 0.2	1.04 ± 0.11	1.8 ± 0.57	0.71 ± 0.17	1.48 ± 0.58	1.07 ± 0.76	0.56 ± 0.26	1.24 ± 0.23	1.56 ± 0.78
D	90	At3g03080.1	Cytoplasm	Zinc-binding dehydrogenase family protein	2-alkenal reductase [NAD(P)+] activity	2.26 ± 0.04	1.86 ± 0.2	1.84 ± 0.16	1.65 ± 0.49	1.96 ± 0.17	1.43 ± 0.27	2 ± 0.11	1.27 ± 0.12	2.09 ± 0.09	2.23 ± 0.46	1.89 ± 0.16	1.74 ± 0.77	2.85 ± 0.45	2.57 ± 0.45
	91	At3g03670.1	Extracellular	peroxidase family protein	peroxidase family protein	1.75 ± 0.42	2.23 ± 0.54	1.52 ± 0.82	1.85 ± 0.8	1.17 ± 0.72	1.88 ± 0.14	1.8 ± 0.4	1.42 ± 0.26	2.15 ± 0.14	2.63 ± 0.16	1.9 ± 0.04	2.21 ± 0.54	2.63 ± 0.5	2.42 ± 0.61
	92	At3g04390.1	Unknown	Aldehyde oxidase/xanthine dehydrogenase	iron ion binding, oxidoreductase activity	1.36 ± 0.18	1.25 ± 0.38	2.05 ± 0.52	1.97 ± 0.77	1.95 ± 0.48	1.68 ± 0.2	1.61 ± 0.35	1.77 ± 0.36	1.45 ± 0.36	1.43 ± 0.36	2.27 ± 0.51	2.44 ± 1.66	1.46 ± 0.86	1.7 ± 0.48
A	93	At3g09640.1	Chloroplast	APX2, ASCORBATE PEROXIDASE 1B, ASCORBATE PEROXIDASE 2	cellular response to oxidative stress, hydrogen peroxide catabolic process, response to reactive oxygen species	0.59 ± 0.17	0.82 ± 0.15	0.59 ± 0.13	0.77 ± 0.16	0.47 ± 0.17	0.97 ± 0.14	0.86 ± 0.21	0.73 ± 0.16	0.99 ± 0.44	0.76 ± 0.14	1.74 ± 0.52	0.68 ± 0.17	1.17 ± 0.93	0.63 ± 0.22
E	94	At3g11180.1	Cytoplasm	JAO 1, JASMONATE-INDUCED OXYGENASE1, JASMONIC ACID OXIDASE 1, JOX1	oxidoreductase, 2OG-Fe(II) oxygenase family protein, regulation of jasmonic acid mediated signaling pathway	1.09 ± 0.23	1.26 ± 0.06	1.15 ± 0.19	1.24 ± 0.04	1.21 ± 0.14	1.32 ± 0.26	1.17 ± 0.18	0.98 ± 0.31	1.1 ± 0.14	0.97 ± 0.15	1.08 ± 0.39	0.77 ± 0.48	0.93 ± 0.51	1.15 ± 0.17
	95	At3g12900.1	Cytoplasm	S8H, SCOPOLETIN 8- HYDROXYLASE	2-oxoglutarate-dependent dioxygenase activity, S8H hydroxylates scopoletin to generate fraxetin (8-hydroxyscopoletin)	1.44 ± 0.18	0.35 ± 0.14	1.26 ± 0.19	1.06 ± 0.58	1.84 ± 0.29	1.32 ± 0.76	3.11 ± 1.34	2.02 ± 0.47	2.15 ± 0.08	2.31 ± 0.41	1.94 ± 0.43	1.82 ± 0.57	2.39 ± 0.2	2.12 ± 0.7
E	96	At3g13390.1	Extracellular	SKS11, SKU5 SIMILAR 11	copper ion binding, oxidoreductase activity	2.36 ± 0.27	2.21 ± 0.53	2.15 ± 0.2	2.63 ± 0.07	1.89 ± 0.17	2.03 ± 0.33	1.93 ± 0.12	2.18 ± 0.51	2.42 ± 0.57	2.13 ± 0.37	2.13 ± 0.42	1.35 ± 0.28	2.38 ± 1.27	1.71 ± 0.15
	97	At3g13400.1	Extracellular	SKS13, SKU5-SIMILAR 13	copper ion binding, oxidoreductase activity	1.41 ± 0.2	1.73 ± 0.1	3.9 ± 1.35	1.29 ± 0.72	1.8 ± 0.23	2.09 ± 0.3	2.03 ± 0.24	1.18 ± 0.24	1.07 ± 0.21	1.06 ± 0.07	1.24 ± 0.21	0.66 ± 0.17	1.7 ± 0.61	1.58 ± 0.92
	98	At3g14140.1	Cytoplasm	2-oxoglutarate (2OG) and Fe(II)-dependent oxygenase	dioxygenase activity	1.52 ± 0.24	1.07 ± 0.42	1.09 ± 0.08	1.14 ± 0.27	3.03 ± 0.85	0.99 ± 0.15	1.33 ± 0.7	1 ± 0.14	0.9 ± 0.18	1.17 ± 0.13	1.03 ± 0.26	1.95 ± 0.49	0.91 ± 0.18	1.19 ± 0.28
	99	At3g14160.1	Nucleus	2-oxoglutarate (2OG) and Fe(II)-dependent oxygenase	dioxygenase activity	0.56 ± 0.18	0.63 ± 0.3	0.95 ± 0.07	0.57 ± 0.06	0.62 ± 0.27	1.04 ± 0.09	0.69 ± 0.25	1.05 ± 0.23	0.54 ± 0.07	1 ± 0.36	1.36 ± 0.38	0.94 ± 0.27	0.96 ± 0.43	0.86 ± 0.19
A	100	At3g22360.1	Mitochondrion	AOX1B, ALTERNATIVE OXIDASE 1B,	alternative oxidase activity, superoxide-generating NADPH oxidase activity, ubiquinol:oxygen oxidoreductase activity	0.99 ± 0.16	0.77 ± 0.11	1 ± 0.23	0.88 ± 0.42	0.87 ± 0.31	0.93 ± 0.38	1.22 ± 0.98	1.08 ± 0.1	1.92 ± 0.39	1.71 ± 0.83	1.02 ± 0.04	1 ± 0.15	1.47 ± 0.7	1.29 ± 0.58
C	101	At3g22370.1	Mitochondrion	AOX1A, ALTERNATIVE OXIDASE 1A,	alternative oxidase activity, superoxide-generating NADPH oxidase activity, ubiquinol:oxygen oxidoreductase activity	1.05 ± 0.07	1.04 ± 0.11	0.98 ± 0.06	0.94 ± 0.09	1.1 ± 0.11	0.94 ± 0.18	0.92 ± 0.13	1.1 ± 0.08	1.07 ± 0.2	0.87 ± 0.11	0.91 ± 0.11	1.27 ± 0.22	1 ± 0.18	0.92 ± 0.14
	102	At3g25760.1	Chloroplast	ALLENE OXIDE CYCLASE 1, AOC1, EARLY-RESPONSIVE TO DEHYDRATION 12, ERD12	catalyzes an essential step in jasmonic acid biosynthesis	0.58 ± 0.19	1.46 ± 0.48	1.71 ± 0.13	1.2 ± 0.39	0.76 ± 0.29	1.36 ± 0.62	1.14 ± 0.42	0.6 ± 0.14	0.96 ± 0.07	1.22 ± 0.12	0.87 ± 0.11	1.23 ± 0.36	1.13 ± 0.35	0.83 ± 0.39
B	103	At3g28490.1	Extracellular	2-oxoglutarate (2OG) and Fe(II)-dependent oxygenase.	dioxygenase activity	2.45 ± 0.33	2.18 ± 0.46	2.21 ± 0.19	2.37 ± 0.39	1.94 ± 0.18	2.07 ± 0.36	1.99 ± 0.1	2.2 ± 0.3	2.15 ± 0.12	2.26 ± 0.34	2.07 ± 0.29	2.2 ± 0.54	2.73 ± 0.53	2.62 ± 0.57
B	104	At3g42570.1	Unknown	peroxidase family protein	peroxidase family protein	2.35 ± 0.31	1.93 ± 0.17	2.09 ± 0.22	1.4 ± 0.75	1.89 ± 0.22	1.99 ± 0.3	1.87 ± 0.05	2.36 ± 0.28	2.1 ± 0.11	2.28 ± 0.42	2.07 ± 0.27	2.22 ± 0.59	2.48 ± 0.37	2.21 ± 0.42
	105	At3g43600.1	Chloroplast	AAO2, ALDEHYDE OXIDASE 2	FAD-binding domain-containing protein	0.96 ± 0.05	0.92 ± 0.07	0.97 ± 0.08	1.01 ± 0.05	0.95 ± 0.06	0.98 ± 0.01	1.04 ± 0.06	0.92 ± 0.04	0.88 ± 0.12	0.99 ± 0.1	1.03 ± 0.1	1.03 ± 0.05	0.96 ± 0.04	1.04 ± 0.06
B	106	At3g45810.1	Nucleus	RBOHJ, RESPIRATORY BURST OXIDASE HOMOLOG J	NAD(P)H oxidase H2O2-forming activity, calcium ion binding, ferric-chelate reductase activity	2 ± 0.37	1.87 ± 0.15	2.15 ± 0.21	2.25 ± 0.31	1.83 ± 0.2	1.97 ± 0.31	1.93 ± 0.13	2.15 ± 0.33	2.12 ± 0.13	2.17 ± 0.29	2.02 ± 0.27	2.14 ± 0.55	2.8 ± 0.51	2.36 ± 0.47
	107	At3g46480.1	Cytoplasm	2-oxoglutarate (2OG) and Fe(II)-dependent oxygenase	dioxygenase activity	1.32 ± 0.31	0.88 ± 0.12	0.63 ± 0.38	0.9 ± 0.49	0.85 ± 0.13	1.19 ± 0.24	1.1 ± 0.13	0.94 ± 0.28	1.69 ± 1.07	0.72 ± 0.31	1.12 ± 0.58	1.62 ± 1.41	0.41 ± 0.03	0.5 ± 0.19
	108	At3g46490.1	Cytoplasm	2-oxoglutarate (2OG) and Fe(II)-dependent oxygenase	dioxygenase activity	1.04 ± 0.17	0.77 ± 0.17	0.86 ± 0.11	1.11 ± 0.29	0.94 ± 0.16	0.9 ± 0.21	1.06 ± 0.03	0.89 ± 0.16	1.04 ± 0.18	1.05 ± 0.17	0.92 ± 0.14	0.99 ± 0.14	0.8 ± 0.1	0.88 ± 0.11
	109	At3g46500.1	Cytoplasm	2-oxoglutarate (2OG) and Fe(II)-dependent oxygenase	dioxygenase activity	1.18 ± 0.16	1.31 ± 0.23	1.22 ± 0.09	1.12 ± 0.18	0.96 ± 0.15	1.02 ± 0.12	1.16 ± 0.14	1.09 ± 0.47	0.95 ± 0.25	0.95 ± 0.16	1.45 ± 0.57	0.65 ± 0.14	1.21 ± 0.18	1.18 ± 0.58
	110	At3g47190.1	Cytoplasm	GA2OX10, GIBBERELLIN 2-OXIDASE 10	C-20 gibberellin 2-beta-dioxygenase activity, dioxygenase activity	2.48 ± 0.32	2.04 ± 0.23	2.25 ± 0.18	2.4 ± 0.39	1.97 ± 0.2	2.49 ± 0.55	2.01 ± 0.1	1.87 ± 0.25	2.04 ± 0.14	2.2 ± 0.39	1.87 ± 0.14	2.58 ± 0.29	2.65 ± 1.36	1.82 ± 0.28
D	111	At3g50990.1	Extracellular	PER36, PEROXIDASE 36, PRX36	peroxidase family protein	1.09 ± 0.08	1.9 ± 0.15	2.29 ± 0.36	2.53 ± 0.28	2.23 ± 0.5	2.25 ± 1.21	1.36 ± 0.36	3.76 ± 1.48	2.21 ± 0.2	2.77 ± 0.3	2.08 ± 0.27	0.98 ± 0.12	5.27 ± 3.73	2.11 ± 0.1
	112	At3g55970.1	Cytoplasm	JAO3, JASMONATE-INDUCED OXYGENASE3	dioxygenase activity, jasmonic acid hydrolase	0.82 ± 0.19	0.64 ± 0.18	0.69 ± 0.35	0.68 ± 0.14	0.86 ± 0.22	1.21 ± 0.81	2.95 ± 2.13	0.83 ± 0.11	0.74 ± 0.04	0.94 ± 0.18	0.84 ± 0.09	1.04 ± 0.18	0.75 ± 0.13	0.74 ± 0.18
D	113	At3g56350.1	Mitochondrion	MSD2, superoxide dismutase	Iron/manganese superoxide dismutase family protein	0.6 ± 0.07	0.6 ± 0.32	0.71 ± 0.14	2.13 ± 0.51	1.41 ± 0.03	0.63 ± 0.22	1.23 ± 0.16	0.56 ± 0.12	1.64 ± 0.14	0.93 ± 0.27	0.91 ± 0.16	1.1 ± 0.85	2.89 ± 2.88	1.78 ± 0.16
	114	At3g56840.1	Mitochondrion	L-2HGDH, L-2-HYDROXYGLUTARATE DEHYDROGENASE	FAD-binding domain-containing protein	1.08 ± 0.05	1.06 ± 0.14	1.03 ± 0.05	1.11 ± 0.09	1 ± 0.09	1.01 ± 0.01	1.01 ± 0.05	1.02 ± 0.12	1.02 ± 0.04	1 ± 0.07	1.17 ± 0.07	1.19 ± 0.15	1.03 ± 0.11	1.01 ± 0.08
D	115	At3g57620.1	Cytoplasm	GOXL4, GALACTOSE OXIDASE-LIKE 4	may function in tissues that require mechanical reinforcements in the absence of lignification.	2 ± 0.23	2.09 ± 0.4	2.03 ± 0.62	2.14 ± 0.54	1.93 ± 0.1	3.43 ± 1.37	2.04 ± 0.45	2.61 ± 0.69	1.95 ± 0.28	1.68 ± 0.25	2.27 ± 0.35	1.47 ± 0.29	3.94 ± 1.61	2.39 ± 0.24
B	116	At3g59845.1	Cytoplasm	Zinc-binding dehydrogenase family protein	2-alkenal reductase [NAD(P)+] activity	2.35 ± 0.3	1.88 ± 0.15	2.13 ± 0.19	2.49 ± 0.52	1.89 ± 0.21	1.99 ± 0.3	1.91 ± 0.11	2.38 ± 0.58	2.1 ± 0.11	2.28 ± 0.43	2.07 ± 0.27	2.21 ± 0.6	2.47 ± 0.36	2.27 ± 0.34
	117	At3g63440.1	Extracellular	CKX6, CYTOKININ OXIDASE 6	FAD-binding domain-containing protein	1.06 ± 0.11	1 ± 0.1	1.14 ± 0.14	1.07 ± 0.1	1.12 ± 0.22	1.07 ± 0.17	1.27 ± 0.02	1.09 ± 0.2	0.85 ± 0.13	0.99 ± 0.18	1.05 ± 0.17	1 ± 0.05	1.03 ± 0.09	1.15 ± 0.11
	118	At4g10490.1	Chloroplast	DLO2, DMR6-LIKE OXYGENASE 2	2-oxoglutarate (2OG) and Fe(II)-dependent oxygenase superfamily protein	1.39 ± 0.27	2.43 ± 0.36	2.13 ± 0.21	1.78 ± 0.28	1.95 ± 0.17	1.13 ± 0.73	2.15 ± 2.43	2.15 ± 0.32	2.13 ± 0.14	2.63 ± 0.15	2.08 ± 0.28	2.23 ± 0.51	2.72 ± 0.6	2.6 ± 0.64
	119	At4g12270.1	Extracellular	Copper amine oxidase family protein	aminoacetone:oxygen oxidoreductase(deaminating) activity, copper ion binding,	2.67 ± 0.51	2.08 ± 0.18	2.1 ± 0.09	2.22 ± 0.59	1.95 ± 0.21	2.59 ± 0.6	3.03 ± 1.99	2.25 ± 0.33	2.19 ± 0.16	4.19 ± 1.43	1.94 ± 0.03	3.7 ± 1.55	2.74 ± 0.27	3.39 ± 1.76
	120	At4g12280.1	Nucleus	Copper amine oxidase family protein	aminoacetone:oxygen oxidoreductase(deaminating) activity, copper ion binding,	1.79 ± 0.39	2.93 ± 0.58	2.33 ± 0.54	2.18 ± 0.55	2.35 ± 0.54	1.67 ± 0.1	2.02 ± 0.07	1.94 ± 0.35	2.16 ± 0.11	2.28 ± 0.38	1.93 ± 0.02	2.22 ± 0.57	2.18 ± 0.96	2.57 ± 0.11
D	121	At4g16270.1	Extracellular	PRX40, PEROXIDASE40	peroxidase family protein	1.01 ± 0.15	0.94 ± 0.06	1.02 ± 0.01	0.98 ± 0.11	1.03 ± 0.04	0.98 ± 0.04	0.96 ± 0.06	1.16 ± 0.2	0.46 ± 0.18	0.43 ± 0.38	1.07 ± 0.27	0.48 ± 0.03	1.6 ± 0.7	1.23 ± 0.34
	122	At4g17690.1	Extracellular	peroxidase family protein	peroxidase family protein	2.41 ± 0.33	0.94 ± 0.17	2.09 ± 0.7	1.41 ± 0.71	1.51 ± 0.32	2.04 ± 0.44	1.84 ± 0.19	2.47 ± 0.08	1.33 ± 0.23	2.41 ± 1.13	1.41 ± 0.47	1.92 ± 0.19	1.51 ± 0.18	2.06 ± 0.58
B	123	At4g20800.1	Cytoplasm	ATBBE17 FAD-binding Berberine family protein	FAD-binding domain-containing protein	2.36 ± 0.3	2.11 ± 0.47	2.15 ± 0.21	2.09 ± 0.4	1.87 ± 0.2	2.01 ± 0.31	1.92 ± 0.16	2.31 ± 0.25	1.96 ± 0.39	2.27 ± 0.39	2.05 ± 0.25	2.17 ± 0.58	2.67 ± 0.5	2.59 ± 0.51
	124	At4g20820.1	Chloroplast	ATBBE18 FAD-binding Berberine family protein	FAD-binding domain-containing protein	1.04 ± 0.14	0.98 ± 0.19	0.98 ± 0.14	1.16 ± 0.16	0.92 ± 0.17	0.87 ± 0.16	1.06 ± 0.12	1.23 ± 0.12	1.05 ± 0.28	1.29 ± 0.24	1 ± 0.17	1.23 ± 1.16	0.91 ± 0.22	0.66 ± 0.09
	125	At4g20830.1	Chloroplast	ATBBE19, ATBBE20, OGOX1, OLIGOGALACTURONIDE OXIDASE 1	FAD-binding domain-containing protein	1.06 ± 0.15	1.04 ± 0.13	1.06 ± 0.09	0.96 ± 0.16	1.11 ± 0.09	1.11 ± 0.12	0.98 ± 0.08	1.05 ± 0.05	0.94 ± 0.07	0.96 ± 0.07	1.06 ± 0.05	1.11 ± 0.13	1.12 ± 0.15	1.05 ± 0.14
	126	At4g20840.1	Chloroplast	ATBBE21, OGOX2, OLIGOGALACTURONIDE OXIDASE 2	FAD-binding domain-containing protein	0.99 ± 0.13	0.94 ± 0.08	0.98 ± 0.1	1.04 ± 0.06	1.04 ± 0.13	0.85 ± 0.17	0.96 ± 0.08	0.99 ± 0.11	0.84 ± 0.05	0.96 ± 0.03	1.06 ± 0.12	0.97 ± 0.13	0.93 ± 0.16	0.91 ± 0.08
	127	At4g20860.1	Cytoplasm	ATBBE22 FAD-binding Berberine family protein	FAD-binding domain-containing protein	1.08 ± 0.16	1.01 ± 0.13	1.1 ± 0.11	1.15 ± 0.07	1.13 ± 0.17	1.17 ± 0.22	1.08 ± 0.04	1.08 ± 0.13	1.07 ± 0.17	1.21 ± 0.06	1.21 ± 0.18	1.28 ± 0.55	1.36 ± 0.29	0.69 ± 0.2
C	128	At4g21830.1	Chloroplast	MSRB7, METHIONINE SULFOXIDE REDUCTASE B7	peptide-methionine (R)-S-oxide reductase activity, peptide-methionine (S)-S-oxide reductase activity	0.97 ± 0.15	1.03 ± 0.17	0.92 ± 0.16	0.88 ± 0.07	0.9 ± 0.24	0.87 ± 0.43	0.84 ± 0.14	1.88 ± 1.83	0.67 ± 0.49	0.81 ± 0.07	1.75 ± 0.35	2.36 ± 1.14	1.27 ± 1.08	0.85 ± 0.21
	129	At4g21840.1	Chloroplast	MSRB8, METHIONINE SULFOXIDE REDUCTASE B8	peptide-methionine (R)-S-oxide reductase activity, peptide-methionine (S)-S-oxide reductase activity	1.05 ± 0.09	1.25 ± 0.19	1.03 ± 0.2	0.96 ± 0.1	1.02 ± 0.16	1.09 ± 0.17	0.77 ± 0.05	0.87 ± 0.12	1.28 ± 0.61	1.28 ± 0.32	1.59 ± 0.6	1.6 ± 0.41	1.29 ± 0.2	1.13 ± 0.41
A	130	At4g21850.1	Chloroplast	MSRB9, METHIONINE SULFOXIDE REDUCTASE B9	peptide-methionine (R)-S-oxide reductase activity, peptide-methionine (S)-S-oxide reductase activity	0.92 ± 0.15	0.92 ± 0.13	0.95 ± 0.08	0.83 ± 0.11	0.97 ± 0.12	0.83 ± 0.09	0.9 ± 0.07	0.87 ± 0.15	1.15 ± 0.26	0.92 ± 0.18	1.08 ± 0.02	0.85 ± 0.08	0.87 ± 0.14	0.98 ± 0.13
	131	At4g21860.1	Chloroplast	MSRB2, , METHIONINE SULFOXIDE REDUCTASE B2	peptide-methionine (R)-S-oxide reductase activity, peptide-methionine (S)-S-oxide reductase activity	0.94 ± 0.19	1.01 ± 0.06	0.98 ± 0.08	0.87 ± 0.11	0.96 ± 0.12	0.89 ± 0.12	0.86 ± 0.08	1 ± 0.1	0.9 ± 0.06	0.87 ± 0.1	0.88 ± 0.03	0.94 ± 0.06	0.9 ± 0.04	0.9 ± 0.09
	132	At4g23420.1	Chloroplast	NAD(P)-binding Rossmann-fold superfamily protein	short-chain dehydrogenase/reductase (SDR) family protein	1.02 ± 0.16	0.83 ± 0.18	1.03 ± 0.16	1.04 ± 0.2	1.01 ± 0.05	1.01 ± 0.04	1.03 ± 0.01	0.63 ± 0.11	0.59 ± 0.23	1.08 ± 0.3	1.06 ± 0.08	0.98 ± 0.07	1.14 ± 0.16	0.76 ± 0.2
D	133	At4g25090.1	Cytoplasm	RBOHG	respiratory burst oxidase, NAD(P)H oxidase H2O2-forming activity, calcium ion binding, ferric-chelate reductase activity, oxidoreductase activity, acting on NAD(P)H, oxygen as acceptor	1.01 ± 0.12	1.03 ± 0.03	1.02 ± 0.15	1.14 ± 0.15	0.99 ± 0.12	1.06 ± 0.16	1.09 ± 0.17	0.86 ± 0.17	0.93 ± 0.33	1.01 ± 0.33	0.99 ± 0.28	1.05 ± 0.88	1.17 ± 0.12	1.08 ± 0.19
	134	At4g25100.1	Chloroplast	FSD1, FE SUPEROXIDE DISMUTASE 1	copper ion binding, superoxide dismutase activity	0.83 ± 0.12	1 ± 0.19	1.08 ± 0.22	1.03 ± 0.57	1.16 ± 0.65	1.09 ± 0.11	1.15 ± 0.13	1.14 ± 0.03	1.02 ± 0.17	0.94 ± 0.2	1.19 ± 0.68	0.74 ± 0.2	0.96 ± 0.08	1.03 ± 0.11
	135	At4g25300.1	Chloroplast	2-oxoglutarate (2OG) and Fe(II)-dependent oxygenase	dioxygenase activity	1.04 ± 0.13	1.15 ± 0.13	1.09 ± 0.08	1.3 ± 0.12	1.11 ± 0.19	1.03 ± 0.19	1.1 ± 0.09	1.24 ± 0.18	1.14 ± 0.18	1.3 ± 0.15	1.1 ± 0.15	1.05 ± 0.17	0.98 ± 0.11	0.98 ± 0.14
A	136	At4g25310.1	Cytoplasm	2-oxoglutarate (2OG) and Fe(II)-dependent oxygenase	dioxygenase activity	0.88 ± 0.11	1.14 ± 0.13	1.11 ± 0.13	1.07 ± 0.12	0.95 ± 0.06	1.12 ± 0.2	0.83 ± 0.47	1.56 ± 0.31	2.39 ± 0.5	1.72 ± 0.16	1.77 ± 0.31	0.72 ± 0.03	2.72 ± 0.56	2.32 ± 1.92
A	137	At4g26010.1	Extracellular	PRX44	peroxidase family protein	1.18 ± 0.22	1.1 ± 0.15	0.99 ± 0.03	0.99 ± 0.27	1.01 ± 0.16	0.98 ± 0.27	1.11 ± 0.1	1.59 ± 0.23	2.66 ± 1.22	1.39 ± 0.55	2.06 ± 1.35	0.77 ± 0.19	2.33 ± 2.19	1.31 ± 0.33
B	138	At4g28090.1	Extracellular	SKS10, SKU5 SIMILAR 10	copper ion binding, oxidoreductase activity	2.5 ± 0.36	1.88 ± 0.14	2.14 ± 0.2	2.28 ± 0.31	1.95 ± 0.2	2.02 ± 0.33	1.92 ± 0.11	2.61 ± 0.32	2.14 ± 0.13	2.21 ± 0.49	1.94 ± 0.08	2.1 ± 0.52	2.4 ± 0.35	2.37 ± 0.36
	139	At4g28220.1	Mitochondrion	NDB1, NAD(P)H DEHYDROGENASE B1	NADH dehydrogenase activity, NADPH dehydrogenase activity, calcium ion binding, oxidoreductase activity	0.94 ± 0.11	0.9 ± 0.07	0.94 ± 0.09	0.82 ± 0.12	1.01 ± 0.16	0.93 ± 0.1	0.91 ± 0.09	0.94 ± 0.1	0.92 ± 0.03	0.93 ± 0.04	0.95 ± 0.02	1 ± 0.02	0.96 ± 0.02	0.98 ± 0.08
	140	At4g29740.1	Extracellular	CKX4, CYTOKININ OXIDASE 4	FAD-binding domain-containing protein	0.9 ± 0.1	1.46 ± 0.24	0.94 ± 0.3	1.18 ± 0.36	1.02 ± 0.2	1.09 ± 0.13	1.06 ± 0.04	0.86 ± 0.11	0.99 ± 0.17	1.03 ± 0.1	1.02 ± 0.26	1.04 ± 0.38	0.94 ± 0.07	1.1 ± 0.16
	141	At4g33870.1	Extracellular	peroxidase family protein	peroxidase family protein	1 ± 0.25	0.8 ± 0.13	1.25 ± 0.22	1.38 ± 0.42	0.71 ± 0.15	0.94 ± 0.33	0.72 ± 0.17	0.99 ± 0.56	1.35 ± 0.48	1.48 ± 0.37	1.15 ± 0.29	0.99 ± 0.19	0.69 ± 0.04	1.4 ± 0.3
	142	At4g34890.1	Plasma membrane	XDH1, XANTHINE DEHYDROGENASE 1	FAD-binding domain-containing protein	1.1 ± 0.21	1.04 ± 0.13	1 ± 0.19	1.08 ± 0.12	1.06 ± 0.04	1.16 ± 0.04	1.02 ± 0.05	0.99 ± 0.17	1.02 ± 0.04	1.18 ± 0.15	1.14 ± 0.12	1.17 ± 0.2	1.12 ± 0.06	0.98 ± 0.18
	143	At4g34900.1	Plasma membrane	XDH2, XANTHINE DEHYDROGENASE 2	FAD-binding domain-containing protein	1.25 ± 0.16	1.03 ± 0.24	0.64 ± 0.12	2.02 ± 0.71	2.34 ± 1	1.54 ± 0.05	1.3 ± 0.68	0.64 ± 0.12	1.07 ± 0.2	1.13 ± 0.19	1.28 ± 0.1	1.4 ± 0.18	0.97 ± 0.06	0.99 ± 0.09
	144	At4g35820.1	Unknown	2-oxoglutarate (2OG) and Fe(II)-dependent oxygenase	dioxygenase activity	1.89 ± 0.29	2.18 ± 0.58	2.19 ± 0.22	2.12 ± 0.5	1.99 ± 0.17	1.74 ± 0.35	2.01 ± 0.09	3.06 ± 0.4	1.8 ± 0.36	2.32 ± 0.35	2.23 ± 0.38	2.2 ± 0.58	2.71 ± 0.5	3.07 ± 0.46
A	145	At4g37160.1	Extracellular	SKS15, SKU5 SIMILAR 15	copper ion binding, oxidoreductase activity, pectinesterase activity	0.75 ± 0.16	0.77 ± 0.08	0.93 ± 0.08	0.82 ± 0.11	0.92 ± 0.21	0.76 ± 0.18	0.67 ± 0.03	0.72 ± 0.11	1.16 ± 0.54	0.58 ± 0.4	2 ± 0.65	1.03 ± 0.22	0.99 ± 0.38	1.1 ± 0.61
A	146	At5g01050.1	Extracellular	LAC9	laccase family protein, copper ion binding, hydroquinone:oxygen oxidoreductase activity, oxidoreductase activity	1.04 ± 0.19	1.08 ± 0.11	1.01 ± 0.06	1.23 ± 0.16	0.93 ± 0.06	1.11 ± 0.19	1.04 ± 0.18	0.9 ± 0.17	1.62 ± 0.63	1.21 ± 0.73	2.97 ± 1.57	1.72 ± 0.39	1.15 ± 0.08	2.04 ± 0.5
	147	At5g03260.1	Extracellular	LAC11	laccase family protein, copper ion binding, hydroquinone:oxygen oxidoreductase activity, oxidoreductase activity	0.8 ± 0.08	0.9 ± 0.23	1.17 ± 0.11	0.67 ± 0.07	1.94 ± 0.45	0.75 ± 0.36	1.12 ± 0.15	1.71 ± 0.97	0.8 ± 0.12	1 ± 0.15	0.99 ± 0.35	0.79 ± 0.14	1.2 ± 0.3	1.56 ± 0.39
C	148	At5g05340.1	Extracellular	PRX52, PEROXIDASE 52	peroxidase family protein	0.87 ± 0.09	1.11 ± 0.24	1.21 ± 0.3	0.88 ± 0.26	1.84 ± 1.08	0.91 ± 0.18	1.08 ± 0.25	1.4 ± 0.18	0.95 ± 0.05	0.92 ± 0.18	0.75 ± 0.11	2.36 ± 2.79	1.7 ± 0.28	0.91 ± 0.49
D	149	At5g05600.1	Cytoplasm	JAO2, JASMONATE-INDUCED OXYGENASE2	dioxygenase activity, jasmonic acid hydrolase	0.99 ± 0.2	1.04 ± 0.18	0.98 ± 0.17	1.08 ± 0.16	1.14 ± 0.13	1.16 ± 0.13	0.97 ± 0.12	1.17 ± 0.17	1.01 ± 0.12	1.06 ± 0.44	1.06 ± 0.29	0.82 ± 0.05	1.25 ± 0.49	1.2 ± 0.05
	150	At5g07200.1	Cytoplasm	GA20OX3, GIBBERELLIN 20-OXIDASE 3	dioxygenase activity, gibberellin 20-oxidase activity	0.78 ± 0.14	1.19 ± 0.31	1.16 ± 0.17	1.35 ± 0.37	0.92 ± 0.15	0.87 ± 0.15	0.71 ± 0.04	0.69 ± 0.11	1.38 ± 0.64	0.51 ± 0.13	0.42 ± 0.14	1.38 ± 1.35	1.16 ± 0.13	2.1 ± 0.61
	151	At5g07480.1	Cytoplasm	KUOX1, KAR-UP OXIDOREDUCTASE 1	2OG-Fe(II) oxygenase family protein	2.22 ± 0.47	2.15 ± 0.55	2.13 ± 0.19	2.89 ± 1.4	1.82 ± 0.12	2.36 ± 0.38	1.92 ± 0.14	1.42 ± 0.23	2.13 ± 0.13	2.79 ± 0.62	1.87 ± 0.51	1.97 ± 0.61	2.42 ± 0.32	2.54 ± 0.45
B	152	At5g09360.1	Extracellular	LAC14, LACCASE 14	laccase family protein, copper ion binding, hydroquinone:oxygen oxidoreductase activity, oxidoreductase activity	3.66 ± 0.84	1.22 ± 0.08	1.71 ± 0.36	1.66 ± 0.41	1.77 ± 0.33	1.33 ± 0.57	2.41 ± 0.41	2.22 ± 0.28	2.07 ± 0.18	1.95 ± 0.01	1.94 ± 0.06	3.35 ± 0.88	2.41 ± 0.21	1.56 ± 0.77
E	153	At5g11540.1	Mitochondrion	GULLO3, L -GULONO-1,4-LACTONE ( L -GULL) OXIDASE 3	FAD-binding domain-containing protein	1.02 ± 0.08	1.02 ± 0.06	1.15 ± 0.15	1.01 ± 0.04	1.14 ± 0.13	0.94 ± 0.12	1.03 ± 0.08	0.91 ± 0.12	1.03 ± 0.08	1.05 ± 0.06	1.09 ± 0.12	0.76 ± 0.21	0.95 ± 0.11	0.98 ± 0.14
	154	At5g14130.1	Extracellular	peroxidase family protein	peroxidase family protein	1.26 ± 0.1	1.21 ± 0.17	1.11 ± 0.08	1.28 ± 0.19	1.36 ± 0.23	1.13 ± 0.26	1.24 ± 0.09	1.6 ± 0.28	0.8 ± 0.27	1.3 ± 0.19	1.14 ± 0.33	1.54 ± 1.76	1.51 ± 0.12	2.09 ± 0.61
	155	At5g16960.1	Cytoplasm	Zinc-binding dehydrogenase family protein	2-alkenal reductase [NAD(P)+] activity	0.96 ± 0.2	0.75 ± 0.49	0.71 ± 0.32	1.01 ± 0.18	0.84 ± 0.11	1.9 ± 0.41	1.09 ± 0.25	0.89 ± 0.09	0.63 ± 0.37	0.65 ± 0.25	2.06 ± 1.56	1.56 ± 0.86	1.74 ± 1.61	0.61 ± 0.16
	156	At5g16970.1	Cytoplasm	AER, ALKENAL REDUCTASE,	2-alkenal reductase [NAD(P)+] activity	0.87 ± 0.15	1.13 ± 0.16	1.16 ± 0.17	1.15 ± 0.07	0.93 ± 0.2	1.37 ± 0.17	1.19 ± 0.13	1 ± 0.15	1.02 ± 0.17	0.94 ± 0.13	1.03 ± 0.1	1.07 ± 0.11	1.14 ± 0.18	0.95 ± 0.15
	157	At5g16980.1	Cytoplasm	Zinc-binding dehydrogenase family protein	2-alkenal reductase [NAD(P)+] activity	0.94 ± 0.18	0.97 ± 0.47	1.28 ± 0.21	0.84 ± 0.26	0.92 ± 0.01	1.68 ± 0.37	1.29 ± 0.2	0.96 ± 0.04	0.99 ± 0.09	0.98 ± 0.1	0.94 ± 0.22	1.39 ± 0.2	0.97 ± 0.19	0.74 ± 0.18
	158	At5g17000.1	Cytoplasm	Zinc-binding dehydrogenase family protein	2-alkenal reductase [NAD(P)+] activity	0.96 ± 0.09	0.94 ± 0.17	0.93 ± 0.05	0.97 ± 0.05	1 ± 0.2	0.89 ± 0.14	1 ± 0.05	1.06 ± 0.16	0.94 ± 0.1	0.93 ± 0.07	0.75 ± 0.21	0.96 ± 0.11	0.96 ± 0.24	0.77 ± 0.13
A	159	At5g17820.1	Extracellular	PER57, PEROXIDASE 57	peroxidase family protein	0.96 ± 0.12	0.93 ± 0.1	0.92 ± 0.07	0.94 ± 0.11	0.88 ± 0.12	0.91 ± 0.19	0.89 ± 0.03	1.34 ± 0.37	1.34 ± 0.56	1.13 ± 0.06	1.49 ± 0.06	0.89 ± 0.48	0.97 ± 0.23	1.15 ± 0.19
	160	At5g19880.1	Extracellular	peroxidase family protein	peroxidase family protein	1.31 ± 0.12	1.26 ± 0.15	0.87 ± 0.08	0.88 ± 0.12	1.15 ± 0.49	2.23 ± 1.67	0.68 ± 0.42	1.5 ± 0.21	1.57 ± 0.4	1.78 ± 0.66	1.32 ± 0.64	2.31 ± 0.68	2.12 ± 0.87	1.29 ± 0.44
	161	At5g19890.1	Extracellular	peroxidase family protein	peroxidase family protein	1.2 ± 0.19	1.66 ± 0.42	1.09 ± 0.13	1.06 ± 0.25	0.98 ± 0.32	1.06 ± 0.08	0.77 ± 0.5	0.91 ± 0.09	0.89 ± 0.3	0.9 ± 0.44	1.18 ± 0.42	0.67 ± 0.27	1.05 ± 0.56	1.32 ± 0.92
A	162	At5g20080.1	Mitochondrion	FAD/NAD(P)-binding oxidoreductase	copper ion binding, cytochrome-b5 reductase activity, acting on NAD(P)H	1.03 ± 0.07	1.05 ± 0.07	1.05 ± 0.08	0.99 ± 0.17	1.06 ± 0.12	1.02 ± 0.02	1.05 ± 0.05	1.08 ± 0.06	1.14 ± 0.05	1.1 ± 0.01	1.07 ± 0.14	1.04 ± 0.17	1.1 ± 0.06	1.12 ± 0.11
	163	At5g20960.1	Chloroplast	AAO1, ALDEHYDE OXIDASE 1	FAD-binding domain-containing protein	1.02 ± 0.1	0.99 ± 0.07	1.12 ± 0.07	1.03 ± 0.11	1.12 ± 0.02	1.05 ± 0.09	1.08 ± 0.03	1.04 ± 0.12	1.12 ± 0.14	1.16 ± 0.22	1.09 ± 0.1	1.09 ± 0.31	1.17 ± 0.15	0.95 ± 0.19
A	164	At5g22410.1	Extracellular	RHS18, ROOT HAIR SPECIFIC 18	heme binding, lactoperoxidase activity, peroxidase activity	1.06 ± 0.22	0.99 ± 0.16	0.92 ± 0.05	0.81 ± 0.22	0.98 ± 0.2	0.57 ± 0.3	1.06 ± 0.2	0.95 ± 0.5	3.59 ± 2.18	1.04 ± 0.74	2.53 ± 1.26	1.09 ± 0.18	1.35 ± 0.78	2.09 ± 1.57
	165	At5g23980.1	Plasma membrane	FRO4, FERRIC REDUCTION OXIDASE 4	ferric-chelate reductase (NADH) activity, ferric-chelate reductase activity	0.67 ± 0.1	0.86 ± 0.09	1.06 ± 0.02	1.77 ± 0.72	1.05 ± 0.22	0.77 ± 0.41	2.06 ± 0.46	0.43 ± 0.12	0.53 ± 0.28	0.93 ± 0.5	1.18 ± 0.26	0.77 ± 0.15	0.96 ± 0.19	0.86 ± 0.16
D	166	At5g23990.1	Plasma membrane	FRO5, FERRIC REDUCTION OXIDASE 5	ferric-chelate reductase (NADH) activity, ferric-chelate reductase activity	1.44 ± 0.31	0.6 ± 0.46	0.85 ± 0.03	0.81 ± 0.27	1.44 ± 0.58	2.03 ± 0.35	1.98 ± 0.09	2.17 ± 0.31	2.13 ± 0.11	2.22 ± 0.38	1.91 ± 0.03	2.1 ± 0.63	2.7 ± 0.53	1.95 ± 0.24
A	167	At5g24070.1	Extracellular	peroxidase family protein	peroxidase family protein	1.01 ± 0.1	1.14 ± 0.19	1.12 ± 0.11	1.13 ± 0.09	1.7 ± 0.78	0.84 ± 0.32	0.79 ± 0.11	3.39 ± 4.57	3.23 ± 2.41	0.85 ± 0.56	1.52 ± 0.06	0.9 ± 0.42	1.46 ± 0.54	1.12 ± 1.01
	168	At5g24140.1	Endoplasmic reticulum	SQP2, SQUALENE MONOOXYGENASE 2	FAD-binding domain-containing protein	1.07 ± 0.27	1.02 ± 0.12	1.1 ± 0.15	1.29 ± 0.14	1.12 ± 0.06	0.91 ± 0.27	1.07 ± 0.14	1.37 ± 0.29	1.01 ± 0.27	1.41 ± 0.19	1.27 ± 0.14	1.33 ± 0.53	1.02 ± 0.71	2.02 ± 0.33
	169	At5g25450.1	Mitochondrion	Cytochrome bd ubiquinol oxidase	mitochondrial respiratory chain complex III	1.06 ± 0.13	1.15 ± 0.09	0.76 ± 0.2	0.97 ± 0.2	0.91 ± 0.25	0.92 ± 0.01	0.67 ± 0.13	1.02 ± 0.19	1.04 ± 0.12	1.06 ± 0.14	0.74 ± 0.28	0.75 ± 0.11	0.79 ± 0.07	0.79 ± 0.18
	170	At5g37940.1	Cytoplasm	Zinc-binding dehydrogenase family protein	2-alkenal reductase [NAD(P)+] activity	1.41 ± 0.14	0.87 ± 0.18	1.15 ± 0.15	0.95 ± 0.11	0.8 ± 0.38	0.96 ± 0.16	1.39 ± 0.58	1.26 ± 0.21	1.64 ± 0.39	1.13 ± 0.29	0.76 ± 0.43	0.91 ± 0.12	1.1 ± 0.27	1.27 ± 0.26
	171	At5g44360.1	Chloroplast	ATBBE23 FAD-binding Berberine family protein	FAD-binding domain-containing protein	0.73 ± 0.11	1.19 ± 0.26	1.16 ± 0.11	1.24 ± 0.13	1.03 ± 0.25	0.81 ± 0.32	0.75 ± 0.11	2.22 ± 0.16	1.75 ± 0.44	1.95 ± 0.39	0.66 ± 0.1	2.06 ± 0.41	1.78 ± 0.99	1.42 ± 0.37
	172	At5g44380.1	Chloroplast	ATBBE24 FAD-binding Berberine family protein	FAD-binding domain-containing protein	0.98 ± 0.15	0.98 ± 0.17	1.04 ± 0.15	1.06 ± 0.08	0.97 ± 0.22	0.97 ± 0.23	0.99 ± 0.09	0.97 ± 0.12	1.3 ± 0.21	1.31 ± 0.19	1.14 ± 0.08	0.92 ± 0.4	0.96 ± 0.14	0.91 ± 0.16
	173	At5g44390.1	Chloroplast	ATBBE25 FAD-binding Berberine family protein	FAD-binding domain-containing protein	1.34 ± 0.23	1.03 ± 0.22	1.05 ± 0.19	1.22 ± 0.18	0.92 ± 0.1	1.07 ± 0.22	1.3 ± 0.05	0.95 ± 0.24	1.03 ± 0.36	1.02 ± 0.12	0.86 ± 0.05	1.18 ± 0.65	1.02 ± 0.14	1.04 ± 0.15
	174	At5g44400.1	Chloroplast	ATBBE26 FAD-binding Berberine family protein	FAD-binding domain-containing protein	0.99 ± 0.23	0.97 ± 0.36	1.17 ± 0.23	0.79 ± 0.1	1.03 ± 0.08	1.19 ± 0.55	0.92 ± 0.22	1.03 ± 0.22	0.88 ± 0.15	0.93 ± 0.22	0.98 ± 0.15	0.91 ± 0.23	1.04 ± 0.11	1.17 ± 0.4
	175	At5g44410.1	Chloroplast	ATBBE27 FAD-binding Berberine family protein	FAD-binding domain-containing protein	1 ± 0.15	0.8 ± 0.22	1.02 ± 0.12	1.15 ± 0.2	0.97 ± 0.16	1 ± 0.08	1.15 ± 0.26	0.97 ± 0.17	1.06 ± 0.1	1.09 ± 0.04	1.03 ± 0.08	0.99 ± 0.24	1 ± 0.05	0.99 ± 0.07
D	176	At5g44440.1	Chloroplast	ATBBE28 FAD-binding Berberine family protein	FAD-binding domain-containing protein	1 ± 0.31	1.04 ± 0.65	1.52 ± 0.69	0.35 ± 0.13	0.76 ± 0.3	1.09 ± 0.53	0.84 ± 0.08	0.72 ± 0.11	1.32 ± 0.12	0.9 ± 0.15	0.8 ± 0.11	2.09 ± 2.9	0.9 ± 0.4	1.42 ± 0.14
B	177	At5g45180.1	Unknown	Flavin-binding monooxygenase family protein	FAD-binding domain-containing protein	2.37 ± 0.31	2.19 ± 0.51	2.13 ± 0.15	1.66 ± 0.85	1.73 ± 0.04	1.91 ± 0.39	1.69 ± 0.12	2.19 ± 0.38	2.13 ± 0.13	2.25 ± 0.41	2.05 ± 0.28	2.23 ± 0.56	2.63 ± 0.5	2.74 ± 0.3
A	178	At5g48100.1	Extracellular	LAC15, LACCASE-LIKE 15	laccase family protein, copper ion binding, hydroquinone:oxygen oxidoreductase activity, oxidoreductase activity	1.28 ± 0.18	0.9 ± 0.15	1.34 ± 0.15	0.64 ± 0.16	1.37 ± 0.21	1.14 ± 0.23	0.96 ± 0.11	2.25 ± 1.78	1.45 ± 0.26	1.36 ± 1.05	1.5 ± 0.35	1.23 ± 0.78	1 ± 0.22	1.65 ± 0.53
	179	At5g48440.1	Chloroplast	FAD-dependent oxidoreductase family protein	FAD-binding domain-containing protein	1.1 ± 0.18	1.08 ± 0.19	1.06 ± 0.15	1.02 ± 0.19	1.1 ± 0.11	1.11 ± 0.12	1.04 ± 0.06	1 ± 0.11	0.99 ± 0.11	1.09 ± 0.11	1.07 ± 0.14	1.14 ± 0.18	1.03 ± 0.04	0.99 ± 0.07
A	180	At5g51060.1	Plasma membrane	RBOHC, RESPIRATORY BURST OXIDASE HOMOLOG C	NAD(P)H oxidase H2O2-forming activity, calcium ion binding, ferric-chelate reductase activity	1.01 ± 0.08	0.98 ± 0.11	1 ± 0.11	0.9 ± 0.2	1.04 ± 0.08	0.94 ± 0.12	1.02 ± 0.15	1.4 ± 0.16	1.3 ± 0.63	1.08 ± 0.28	1.2 ± 0.18	0.9 ± 0.48	1.19 ± 0.2	1.17 ± 0.23
A	181	At5g51930.1	Chloroplast	Glucose-methanol-choline (GMC) oxidoreductase family protein	FAD-binding domain-containing protein	0.84 ± 0.23	0.82 ± 0.05	0.78 ± 0.12	1.08 ± 0.18	0.85 ± 0.16	0.79 ± 0.13	0.78 ± 0.08	2.3 ± 1.96	2.4 ± 0.44	1.45 ± 0.63	1.79 ± 0.12	0.88 ± 0.31	1.32 ± 0.34	0.72 ± 0.08
	182	At5g54000.1	Cytoplasm	2-oxoglutarate (2OG) and Fe(II)-dependent oxygenase	dioxygenase activity	0.59 ± 0.22	0.58 ± 0.41	0.84 ± 0.32	2.5 ± 0.34	1.24 ± 0.55	2.59 ± 0.48	0.6 ± 0.22	2.02 ± 0.46	2.45 ± 0.56	2.35 ± 0.58	1.58 ± 0.33	1 ± 0.23	2.77 ± 0.62	2.51 ± 1.42
D	183	At5g56470.1	Mitochondrion	GULLO7, L -GULONO-1,4-LACTONE ( L -GULL) OXIDASE 7	FAD-binding domain-containing protein	2 ± 0.54	1.28 ± 0.69	2.4 ± 1.04	1.34 ± 0.42	1.96 ± 0.18	1.46 ± 0.92	1.03 ± 0.24	1.48 ± 0.34	1.63 ± 0.57	2.21 ± 0.46	2.06 ± 0.47	2.12 ± 0.68	2.71 ± 0.59	2.12 ± 0.55
	184	At5g56490.1	Extracellular	GULLO4, L -GULONO-1,4-LACTONE ( L -GULL) OXIDASE 4	FAD-binding domain-containing protein	2.37 ± 0.3	2.26 ± 0.51	1.97 ± 0.35	1.93 ± 0.27	1.73 ± 0.32	2.18 ± 0.59	1.83 ± 0.13	0.82 ± 0.15	0.97 ± 0.32	1.29 ± 0.08	1.22 ± 0.09	1.1 ± 0.42	0.73 ± 0.23	0.94 ± 0.25
	185	At5g56970.1	Extracellular	CKX3, CYTOKININ OXIDASE 3	FAD-binding domain-containing protein	1.04 ± 0.25	0.88 ± 0.12	1.18 ± 0.07	0.99 ± 0.06	1 ± 0.33	1.01 ± 0.07	1.11 ± 0.15	1.31 ± 0.23	1.71 ± 0.38	1.07 ± 0.3	1.55 ± 0.27	0.74 ± 0.06	0.89 ± 0.2	0.64 ± 0.17
	186	At5g58400.1	Extracellular	peroxidase family protein	peroxidase family protein	2.52 ± 0.38	2.65 ± 0.62	2.15 ± 0.15	2.48 ± 0.37	2.33 ± 0.57	2.12 ± 0.35	2.02 ± 0.13	1.81 ± 0.51	1.99 ± 0.24	2.08 ± 0.12	1.7 ± 0.23	2 ± 0.75	1.35 ± 0.11	0.98 ± 0.35
A	187	At5g58910.1	Extracellular	LAC16, LACCASE 16	laccase family protein, copper ion binding, hydroquinone:oxygen oxidoreductase activity, oxidoreductase activity	1.11 ± 0.09	1.03 ± 0.09	1.05 ± 0.09	1.19 ± 0.19	1.02 ± 0.14	1.14 ± 0.07	1.25 ± 0.09	0.89 ± 0.25	1.41 ± 0.27	0.96 ± 0.03	1.28 ± 0.95	0.74 ± 0.19	1.18 ± 0.28	1.31 ± 0.22
E	188	At5g60010.1	Nucleus	RBOHH, RESPIRATORY BURST OXIDASE HOMOLOG H	ferric reductase-like transmembrane component family protein similar to respiratory burst oxidase protein D RbohD from Arabidopsis thaliana, EMBL:AF055357 [gi:3242789], respiratory burst oxidase homolog from Solanum tuberosum [GI:16549089]; contains...	2.45 ± 0.33	1.96 ± 0.12	2.21 ± 0.19	2.19 ± 0.48	1.99 ± 0.15	2.08 ± 0.34	2 ± 0.11	2.22 ± 1.08	2.07 ± 0.04	2.15 ± 0.29	2.07 ± 0.3	0.88 ± 0.17	1.81 ± 1.23	1.87 ± 0.12
A	189	At5g64100.1	Extracellular	PRX69	peroxidase family protein	1.16 ± 0.22	1.06 ± 0.14	0.95 ± 0.09	1.3 ± 0.17	0.95 ± 0.13	1.13 ± 0.15	0.97 ± 0.04	1.13 ± 0.58	1.15 ± 0.32	1.24 ± 0.53	1.67 ± 0.3	1.19 ± 0.8	1.1 ± 0.19	1.52 ± 0.66
E	190	At5g64110.1	Extracellular	peroxidase family protein	peroxidase family protein	1.32 ± 0.28	1.13 ± 0.23	1.11 ± 0.24	1.4 ± 0.21	1.21 ± 0.22	1.16 ± 0.09	0.92 ± 0.19	1.14 ± 0.15	1.16 ± 0.08	1.19 ± 0.28	1.39 ± 0.09	0.99 ± 0.11	1.14 ± 0.25	0.96 ± 0.17
	191	At5g64120.1	Extracellular	PRX71, PEROXIDASE 71	peroxidase family protein	0.9 ± 0.2	1.06 ± 0.17	0.91 ± 0.09	1.12 ± 0.1	1 ± 0.15	1.04 ± 0.23	0.83 ± 0.05	0.74 ± 0.24	0.94 ± 0.12	0.7 ± 0.14	0.93 ± 0.14	0.81 ± 0.6	1.03 ± 0.13	0.79 ± 0.13
	192	At5g64210.1	Mitochondrion	AOX2, ALTERNATIVE OXIDASE 2	alternative oxidase activity, superoxide-generating NADPH oxidase activity, ubiquinol:oxygen oxidoreductase activity	0.43 ± 0.08	0.44 ± 0.17	1.24 ± 0.44	1.95 ± 0.46	0.74 ± 0.27	1.03 ± 0.85	1.18 ± 0.6	0.86 ± 0.21	0.75 ± 0.19	1.77 ± 0.58	1.67 ± 0.54	2.19 ± 0.82	2.65 ± 0.55	2.45 ± 0.28
	193	At5g67290.1	Chloroplast	FAD-dependent oxidoreductase family protein	FAD-binding domain-containing protein	1 ± 0.09	0.94 ± 0.13	0.87 ± 0.08	1 ± 0.01	1.05 ± 0.21	0.92 ± 0.07	0.91 ± 0.01	1.03 ± 0.15	0.99 ± 0.03	0.93 ± 0.01	0.96 ± 0.09	0.9 ± 0.08	0.9 ± 0.01	0.9 ± 0.05
A	194	At5g67400.1	Extracellular	PRX73	peroxidase family protein	1.03 ± 0.17	1.15 ± 0.2	1.01 ± 0.11	1.01 ± 0.19	1.21 ± 0.18	1.03 ± 0.28	1.23 ± 0.21	0.62 ± 0.03	2.08 ± 0.68	1.58 ± 0.83	2.21 ± 1.38	0.72 ± 0.07	2.25 ± 1.88	1.11 ± 0.2
