# Supplementary material for: Transcriptomics and Metabolomics of Reactive Oxygen Species Modulation in Near-Null Magnetic Field-Induced Arabidopsis thaliana
Source: Biomolecules. 2022 Dec 6;12(12):1824. doi: 10.3390/biom12121824 (PMC9775259; doi:10.3390/biom12121824)
Supplement: Supplementary file 1 [file biomolecules-12-01824-s001.zip › Supplementary Table S3.xlsx]

## Sheet: Supplementary Table S3
Supplementary Table S3: Tukey’s HSD post hoc differences in H2O2 content. *P<0.05; **P<0.01; ***P<0.001
	GMF SHOOT 96H	NNMF SHOOT 96H	GMF ROOT 96H	NNMF ROOT 96H	GMF SHOOT 48H	NNMF SHOOT 48H	GMF ROOT 48H	NNMF ROOT 48H	GMF SHOOT 24H	NNMF SHOOT 24H	GMF ROOT 24H	NNMF ROOT 24H
GMF SHOOT 96H		-0.0031***	0.0334***	0.0251*	0.0326***	0.0183	0.0245	0.0136	0.0758***	0.0091	0.0354***	-0.0015
NNMF SHOOT 96H	0.0031***		0.0366	0.0283	0.0358	0.0215	0.0277	0.0168	0.079***	0.0123	0.0386	0.0015***
GMF ROOT 96H	-0.0334*	-0.0366*		-0.0082	-0.0007	-0.0151	-0.0088	-0.0197	0.0424***	-0.0243	0.002	-0.035*
NNMF ROOT 96H	-0.0251***	-0.0283***	0.0082		0.0075	-0.0068	-0.0006	-0.0115	0.0506***	-0.016	0.0102	-0.0267***
GMF SHOOT 48H	-0.0326	-0.0358	0.0007	-0.0075		-0.0143	-0.0081	-0.019	0.0431***	-0.0235	0.0027	-0.0342
NNMF SHOOT 48H	-0.0183	-0.0215*	0.0151	0.0068	0.0143		0.0062	-0.0046	0.0575***	-0.0092	0.0171	-0.0199*
GMF ROOT 48H	-0.0245	-0.0277	0.0088	0.0006	0.0081	-0.0062		-0.0109***	0.0513***	-0.0154	0.0109	-0.0261
NNMF ROOT 48H	-0.0136***	-0.0168***	0.0197***	0.0115***	0.019***	0.0046***	0.0109***		0.0622***	-0.0045***	0.0218***	-0.0152***
GMF SHOOT 24H	-0.0758	-0.079	-0.0424	-0.0506	-0.0431	-0.0575	-0.0513	-0.0622		-0.0667*	-0.0403*	-0.0774
NNMF SHOOT 24H	-0.0091***	-0.0123***	0.0243	0.016	0.0235	0.0092	0.0154	0.0045	0.0667***		0.0263***	-0.0107***
GMF ROOT 24H	-0.0354	-0.0386	-0.002***	-0.0102*	-0.0027***	-0.0171	-0.0109*	-0.0218	0.0403***	-0.0263		-0.037
NNMF ROOT 24H	0.0015	-0.0015	0.035	0.0267	0.0342	0.0199	0.0261	0.0152	0.0774	0.0107	0.037
