# Supplementary material for: Transcriptomics and Metabolomics of Reactive Oxygen Species Modulation in Near-Null Magnetic Field-Induced Arabidopsis thaliana
Source: Biomolecules. 2022 Dec 6;12(12):1824. doi: 10.3390/biom12121824 (PMC9775259; doi:10.3390/biom12121824)
Supplement: Supplementary file 1 [file biomolecules-12-01824-s001.zip › Supplementary Table S4.xlsx]

## Sheet: H2O2 involvement
Supplementary Table S4 Selected genes involved in H2O2 production (data extracted from Supplementary Table S2)
				ROOTS				SHOOTS
Gene locus	Subcellularprediction	Genecode	Genefunction	4h	24h	48h	96h	4h	24h	48h	96h
At1g05240.1	Extracellular	PRX01,PATHOGENESISRELATED9,PR9,	peroxidasefamilyprotein	0.9521	1.1311	0.9719	1.0125	1.8634	0.9222	1.4418	2.3275
At1g05250.1	Extracellular	PRX2,PEROXIDASE2	peroxidasefamilyprotein	0.8621	1.0113	0.8316	0.9828	2.8393	0.6717	1.2319	2.1856
At1g05260.1	Extracellular	PER3,PEROXIDASE3	peroxidasefamilyprotein	1.1905	1.201	1.0911	1.2115	1.0917	0.921	1.3718	1.5131
At1g07890.1	Chloroplast	APX1,ASCORBATEPEROXIDASE1	L-ascorbateperoxidaseactivity, hemebinding, p-coumarate3-hydroxylaseactivity, peroxidaseactivity,	0.9306	1.08	0.9206	0.9404	1.0113	1.2119	0.9813	0.9918
At1g08830.1	Cytoplasm	SOD1,COPPER/ZINCSUPEROXIDEDISMUTASE1	superoxidedismutase[Cu-Zn](SODCC)/copper/zincsuperoxidedismutase(CSD1)identicaltoSWISS-PROT:P24704[At1g08830.1]	1.0419	1.0113	1.0106	0.9405	0.9749	1.2325	0.9201	0.9631
At1g12520.1	Chloroplast	CCS,COPPERCHAPERONEFORSOD1	copperionbinding, superoxidedismutasecopperchaperoneactivity	0.9709	0.9712	0.9603	1.0522	0.9451	1.1724	0.9607	0.836
At1g14540.1	Extracellular	PER4,PEROXIDASE4,PRX4	peroxidasefamilyprotein	0.9918	0.8811	1.0825	0.823	1.311	0.9314	0.9806	0.625
At1g14550.1	Extracellular	PER5,PEROXIDASE5	peroxidasefamilyprotein	0.9239	0.815	1.0614	1.083	1.196	1.1531	1.119	0.6707
At1g20630.1	Cytoplasm	CAT1,CATALASE1	catalaseactivity, cobaltionbinding, hemebinding, proteinbinding	0.7635	0.6519	0.8534	1.2764	1.9241	0.842	0.6614	0.7618
At1g24110.1	Extracellular	PER6,PEROXIDASE6	peroxidasefamilyprotein	2.2634	1.7642	1.8637	1.8426	1.528	2.2978	2.2346	2.3638
At1g30870.1	Extracellular	PER7,PEROXIDASE7	peroxidasefamilyprotein	0.9119	1.272	0.9524	1.0216	2.0707	0.6708	2.261	1.214
At1g33660.1	Unknown	peroxidasefamilyprotein	peroxidasefamilyprotein	0.7309	0.8517	0.409	0.5313	0.9233	1.2735	0.8311	0.7822
At1g34510.1	Extracellular	PER8,PEROXIDASE8	peroxidasefamilyprotein	1.1308	1.5317	0.649	1.2349	2.4235	0.5729	1.9334	2.6779
At1g49570.1	Extracellular	PER10,PEROXIDASE10	peroxidasefamilyprotein	0.7322	0.9932	0.9221	0.5748	1.6978	0.9606	2.1431	0.955
At1g77100.1	Extracellular	PER13,PEROXIDASE13	peroxidasefamilyprotein	1.5941	1.6741	1.3573	1.6931	1.52	1.2929	1.3669	1.3124
At2g18140.1	Extracellular	PER14,PEROXIDASE14	peroxidasefamilyprotein	1.5632	0.9318	1.36	0.3512	1.9741	2.2153	1.9674	2.2259
At2g18150.1	Extracellular	PER15,PEROXIDASE15	peroxidasefamilyprotein	1.1827	1.0923	1.3429	0.8818	0.9513	0.8913	1.2613	1.543
At2g28190.1	Chloroplast	SOD2,SUPEROXIDEDISMUTASE2	superoxidedismutase[Cu-Zn],chloroplast(SODCP)/copper/zincsuperoxidedismutase	1.14	1.071	0.9707	1.0921	0.9254	1.4123	0.9408	0.8249
At2g35380.1	Unknown	PER20,PEROXIDASE20	peroxidasefamilyprotein	1.0609	1.22	0.9919	1.218	0.628	1.1814	1.65	1.9353
At2g39040.1	Extracellular	PER24,PEROXIDASE24	peroxidasefamilyprotein	0.941	0.941	0.739	0.7803	1.4462	1.6994	1.6632	0.9417
At2g43480.1	Extracellular	PER26,PEROXIDASE26	peroxidasefamilyprotein	0.8204	0.8814	0.9306	0.8205	1.126	0.5514	1.0518	2.0923
At3g01190.1	Extracellular	PER27,PEROXIDASE27	peroxidasefamilyprotein	1.1812	1.212	1.112	1.0411	1.0776	0.5626	1.2423	1.5678
At3g03670.1	Extracellular	PER28,PEROXIDASE28	peroxidasefamilyprotein	1.858	1.1772	1.8814	1.84	1.904	2.2154	2.635	2.4261
At3g09640.1	Chloroplast	APX2,ASCORBATEPEROXIDASE1B,ASCORBATEPEROXIDASE2	cellularresponsetooxidativestress, hydrogenperoxidecatabolicprocess, responsetoreactiveoxygenspecies	0.7716	0.4717	0.9714	0.8621	1.7452	0.6817	1.1793	0.6322
At3g42570.1	Unknown	peroxidasefamilyprotein	peroxidasefamilyprotein	1.475	1.8922	1.993	1.8705	2.0727	2.2259	2.4837	2.2142
At3g45810.1	Nucleus	RBOHJ,RESPIRATORYBURSTOXIDASEHOMOLOGJ	NAD(P)HoxidaseH2O2-formingactivity, calciumionbinding, ferric-chelatereductaseactivity	2.2531	1.832	1.9731	1.9313	2.0227	2.1455	2.851	2.3647
At3g50990.1	Extracellular	PER36,PEROXIDASE36,PRX36	peroxidasefamilyprotein	2.5328	2.235	2.2521	1.3636	2.0827	0.9812	5.2773	2.111
At4g16270.1	Extracellular	PRX40,PEROXIDASE40	peroxidasefamilyprotein	0.9811	1.0304	0.9804	0.9606	1.0727	0.4803	1.67	1.2334
At4g17690.1	Extracellular	PER41,PEROXIDASE41	peroxidasefamilyprotein	1.4171	1.5132	2.0444	1.8419	1.4147	1.9219	1.5118	2.0658
At4g25090.1	Cytoplasm	RBOHG	respiratoryburstoxidase,NAD(P)HoxidaseH2O2-formingactivity,calciumionbinding,ferric-chelatereductaseactivity,oxidoreductaseactivity,actingonNAD(P)H,oxygenasacceptor	1.1415	0.9912	1.0616	1.0917	0.9928	1.0588	1.1712	1.0819
At4g26010.1	Extracellular	PRX44	peroxidasefamilyprotein	0.9927	1.0116	0.9827	1.111	2.0635	0.7719	2.3319	1.3133
At4g33870.1	Extracellular	PER48,PEROXIDASE48	peroxidasefamilyprotein	1.3842	0.7115	0.9433	0.7217	1.1529	0.9919	0.6904	1.43
At5g05340.1	Extracellular	PRX52,PEROXIDASE52	peroxidasefamilyprotein	0.8826	1.8408	0.9118	1.0825	0.7511	2.3679	1.728	0.9149
At5g14130.1	Extracellular	PER55,PEROXIDASE55	peroxidasefamilyprotein	1.2819	1.3623	1.1326	1.2409	1.1433	1.5476	1.5112	2.0961
At5g17820.1	Extracellular	PER57,PEROXIDASE57	peroxidasefamilyprotein	0.9411	0.8812	0.9119	0.8903	1.4906	0.8948	0.9723	1.1519
At5g19880.1	Extracellular	PER58,PEROXIDASE58	peroxidasefamilyprotein	0.8812	1.1549	2.2367	0.6842	1.3264	2.3168	2.1287	1.2944
At5g19890.1	Extracellular	PER59,PEROXIDASE59	peroxidasefamilyprotein	1.0625	0.9832	1.0608	0.775	1.1842	0.6727	1.0556	1.3292
At5g24070.1	Extracellular	PER61,PEROXIDASE61	peroxidasefamilyprotein	1.1309	1.778	0.8432	0.7911	1.5206	0.942	1.4654	1.1201
At5g51060.1	Plasmamembrane	RBOHC,RESPIRATORYBURSTOXIDASEHOMOLOGC	NAD(P)HoxidaseH2O2-formingactivity, calciumionbinding, ferric-chelatereductaseactivity	0.92	1.0408	0.9412	1.0215	1.218	0.948	1.192	1.1723
At5g58400.1	Extracellular	PER68,PEROXIDASE68	peroxidasefamilyprotein	2.4837	2.3357	2.1235	2.0213	1.723	2.75	1.3511	0.9835
At5g60010.1	Nucleus	RBOHH,RESPIRATORYBURSTOXIDASEHOMOLOGH	ferricreductase-liketransmembranecomponentfamilyproteinsimilartorespiratoryburstoxidaseproteinDRbohDfromArabidopsisthaliana,EMBL:AF055357[gi:3242789],respiratoryburstoxidasehomologfromSolanumtuberosum[GI:16549089];contains...	2.1948	1.9915	2.0834	2.11	2.073	0.8817	1.8123	1.8712
At5g64100.1	Extracellular	PRX69	peroxidasefamilyprotein	1.317	0.9513	1.1315	0.9704	1.673	1.198	1.119	1.5266
At5g64110.1	Extracellular	PER68,PEROXIDASE69	peroxidasefamilyprotein	1.421	1.2122	1.1609	0.9219	1.3909	0.9911	1.1425	0.9617
At5g64120.1	Extracellular	PRX71,PEROXIDASE71	peroxidasefamilyprotein	1.121	1.15	1.0423	0.8305	0.9314	0.816	1.0313	0.7913
At5g67400.1	Extracellular	PRX73	peroxidasefamilyprotein	1.0119	1.2118	1.0328	1.2321	2.2138	0.7207	2.2588	1.112
