# Supplementary material for: Transcriptomics and Metabolomics of Reactive Oxygen Species Modulation in Near-Null Magnetic Field-Induced Arabidopsis thaliana
Source: Biomolecules. 2022 Dec 6;12(12):1824. doi: 10.3390/biom12121824 (PMC9775259; doi:10.3390/biom12121824)
Supplement: Supplementary file 1 [file biomolecules-12-01824-s001.zip › Supplementary Table S5.xlsx]

## Sheet: Supplementary Table S5
	Supplementray Table S5 - Quantitative data (SD) on chemical composition of polyphenols
#		ROOT						LEAF
		24H		48H		96H		24H		48H		96H
		GMF	NNMF	GMF	NNMF	GMF	NNMF	GMF	NNMF	GMF	NNMF	GMF	NNMF
1	daidzein.galactoside	0.554 (2.569)	0.772 (2.484)	0.389 (2.455)	0.867 (4.617)	0.533 (3.088)	0.822 (2.559)	0.922 (1.97)	7.877 (4.503)	4.036 (2.991)	11.942 (1.256)	0.415 (1.995)	0.167 (3.95)
2	genistein.galactoside							0.286 (2.912)	0.187 (2.045)	0.288 (4.796)	0.242 (1.131)	0.12 (1.831)	0.026 (2.343)
3	dihydrogenistein.galactoside							0.077 (2.02)	0.445 (2.746)	0.54 (2.734)	0.068 (3.128)	0.028 (2.934)	0.024 (2.53)
4	unknown1	3.143 (1.829)	5.383 (2.88)	4.93 (1.501)	8.903 (1.334)	4.036 (4.788)	2.083 (1.992)	7.042 (1.557)	10.842 (2.159)	17.703 (2.834)	26.912 (1.597)	38.488 (1.137)	3.962 (3.363)
5	genistein.glucoside							0.218 (1.012)	0.311 (3.42)	0.72 (2.888)	1.447 (1.795)	0.104 (4.82)	0.091 (2.582)
6	dihydrogenistein.glucoside							0.13 (1.166)	0.47 (4.148)	0.24 (2.519)	0.347 (2.458)	0.026 (4.833)	0.023 (2.085)
7	dihydrogenistein.glucuronide	0.101 (1.923)	0.329 (4.15)	0.158 (2.182)	0.645 (3.785)	0.15 (3.416)	0.507 (4.5)	0.6 (4.915)	0.414 (2.131)	1.093 (1.205)	2.48 (2.13)	0.443 (2.131)	0.317 (2.589)
8	dihydrokaempferol.glucoside							1.387 (2.697)	1.902 (3.511)	1.933 (1.297)	2.915 (4.637)	0.332 (4.782)	0.281 (2.303)
9	daidzein.glucoside	0.556 (3.894)	0.752 (4.109)	0.35 (4.301)	1.047 (2.746)	1.113 (3.948)	0.695 (3.939)	2.747 (3.104)	5.863 (1.072)	1.939 (2.614)	5.866 (3.015)	0.724 (1.461)	0.481 (2.492)
10	Dihydromyricetin.diglucoside	0.237 (3.154)	0.526 (1.281)	0.495 (4.456)	2.228 (4.649)	0.544 (1.482)	0.258 (3.559)	2.108 (2.301)	6.56 (3.609)	2.806 (1.508)	4.074 (2.864)	1.243 (4.107)	0.763 (4.549)
11	quercetin.rutinoside	0.244 (4.577)	1.737 (4.237)	1.782 (3.934)	1.938 (2.285)	0.131 (1.452)	0.048 (1.235)	25.062 (2.833)	30.575 (3.224)	63.335 (2.811)	120.489 (3.673)	21.619 (2.369)	5.882 (2.55)
12	dyhydroquercetin.rutinoside	0.114 (4.245)	0.216 (2.84)	1.916 (3.055)	0.607 (2.436)	0.159 (4.567)	0.75 (4.321)	8.435 (3.447)	6.442 (2.428)	18.046 (4.935)	16.422 (4.652)	7.798 (4.156)	1.845 (3.512)
13	dihydrohesperetin.neohesperidoside							0.397 (4.115)	12.575 (2.898)	7 (4.632)	10.426 (2.001)	0.297 (2.529)	0.08 (4.491)
14	kaempherol.rutinoside	6.388 (4.599)	13.957 (4.491)	14.025 (3.647)	38.135 (4.324)	9.575 (2.794)	9.545 (1.783)	17.536 (2.844)	15.332 (4.113)	11.32 (3.098)	8.638 (4.725)	8.042 (1.836)	8.478 (2.692)
15	quercetin.sambubioside	2.496 (3.806)	5.308 (3.78)	4.722 (1.851)	19.887 (1.061)	3.486 (2.371)	2.881 (3.979)	3.11 (2.453)	14.357 (3.679)	7.835 (2.156)	17.898 (2.142)	1.563 (1.111)	0.765 (2.764)
16	Quercetin.dirhamnopyranoside	0.864 (1.114)	6.782 (4.818)	7.843 (3.217)	22.775 (4.216)	1.309 (4.411)	1.275 (3.452)	40.218 (4.895)	37.556 (1.093)	12.393 (4.52)	36.02 (2.437)	18.352 (3.301)	12.712 (2.079)
17	dyhydroquercetin.sambubioside	0.179 (4.69)	0.572 (4.808)	0.16 (2.643)	0.865 (1.279)	0.171 (1.914)	0.058 (4.984)	2.611 (4.099)	8.627 (3.859)	3.75 (1.889)	13.646 (2.871)	1.043 (1.875)	0.425 (4.325)
18	isorhamnetin.rutinoside	2.188 (4.508)	3.366 (4.562)	3.654 (4.69)	11.185 (3.072)	3.536 (3.8)	1.888 (2.644)	3.735 (4.239)	8.589 (3.924)	23.404 (1.423)	55.723 (3.256)	5.311 (4.745)	2.146 (2.693)
19	myrcetin.rutinoside	0.931 (3.235)	1.146 (4.297)	1.176 (2.379)	3.819 (4.31)	1.002 (2.113)	1.074 (1.824)	1.128 (2.266)	4.59 (2.525)	8.402 (1.375)	18.566 (3.729)	1.85 (2.11)	0.693 (1.445)
20	dihydroquercetin.galactoside	0.349 (3.552)	0.412 (3.101)	0.93 (4.385)	3.322 (2.318)	0.755 (1.041)	0.451 (2.769)	0.616 (2.54)	2.349 (4.705)	1.646 (2.798)	2.251 (4.409)	0.483 (1.875)	0.566 (4.41)
21	kaempherol.sambubioside							14.141 (3.04)	55.349 (2.033)	27.925 (2.267)	67.739 (1.403)	3.864 (1.294)	2.516 (1.886)
22	dihydromyricetin.sambubioside							2.933 (1.894)	4.176 (4.391)	2.643 (3.586)	16.217 (2.295)	1.287 (2.608)	0.864 (1.319)
23	myrcetin.diglucoside							6.276 (3.857)	7.574 (3.4)	4.5 (2.519)	9.579 (4.06)	0.888 (3.435)	3.034 (3.293)
24	isorhamnetin.sambubioside	0.304 (2.416)	1.237 (4.207)	0.198 (3.511)	1.028 (4.299)	0.067 (2.741)	0.093 (2.928)	10.607 (4.773)	34.978 (4.818)	19.258 (1.144)	45.61 (4.137)	3.683 (2.196)	2.103 (2.676)
25	quercetin.rhamnoside	0.218 (4.201)	0.371 (3.283)	0.075 (2.355)	0.889 (4.463)	1.654 (1.358)	0.323 (1.294)	5.851 (2.79)	6.369 (1.751)	2.676 (4.546)	7.471 (2.325)	0.431 (4.984)	0.491 (1.157)
26	daidzein.glucuronide	1.474 (1.188)	2.785 (2.131)	1.438 (4.447)	5.838 (2.093)	1.2 (3.949)	0.744 (2.164)	2.54 (3.618)	0.948 (4.109)	8.181 (1.596)	2.868 (2.934)	0.881 (1.971)	0.653 (2.528)
27	dihydroquercetin.glucoside	0.833 (4.901)	2.114 (4.884)	1.193 (3.362)	6.38 (3.156)	0.577 (4.423)	0.957 (1.621)	0.576 (3.545)	2.942 (1.699)	5.394 (2.12)	0.906 (2.653)	0.519 (3.862)	0.622 (3.099)
28	unknown2	21.634 (2.028)	40.289 (3.808)	0.42 (1.445)	1.013 (4.92)	5.068 (3.77)	1.306 (2.068)	11.288 (4.862)	3.056 (2.898)	6.244 (1.657)	1.651 (2.977)	1.699 (3.66)	10.085 (4.22)
29	dyhydromyrcetin.galactoside	5.699 (3.923)	11.126 (3.82)	6.479 (2.846)	14.913 (3.461)	13.564 (1.761)	3.369 (2.696)	3.122 (1.001)	1.956 (1.026)	13.985 (2.845)	2.881 (1.583)	4.753 (2.348)	2.732 (3.844)
30	quercetin.galactoside	1.297 (3.202)	2.508 (3.009)	0.115 (3.105)	0.777 (1.022)	0.624 (2.367)	0.361 (4.794)
31	isorhamnetin.galactoside	0.309 (2.377)	2.656 (3.046)	0.37 (4.218)	1.493 (3.245)	1.2 (3.842)	0.654 (4.861)
32	dyhydromyrcetin.rutinoside							1.205 (2.752)	2.256 (1.461)	2.879 (3.569)	3.502 (4.997)	0.418 (4.513)	0.426 (2.721)
33	isorhamnetin.glucoside	0.414 (1.306)	0.257 (1.76)	0.432 (3.051)	1.3 (2.385)	0.762 (2.84)	0.487 (1.74)
34	quercetin.glucoside	0.657 (2.932)	0.383 (1.102)	0.11 (1.588)	0.999 (3.105)	0.657 (1.993)	0.291 (1.531)
35	dihydroquercetin.diglucoside							1.296 (2.573)	38.918 (3.227)	9.255 (1.628)	26.138 (1.914)	1.747 (1.358)	1.228 (1.405)
36	dyhydromyrcetin.glucoside	0.222 (2.48)	0.387 (1.142)	1.135 (1.429)	1.681 (2.72)	0.692 (2.966)	1.567 (3.455)	0.629 (4.638)	2.033 (4.81)	1.716 (2.798)	2.346 (4.23)	0.194 (4.802)	0.349 (4.169)
37	dyhydromyrcetin.rhamnoside	1.91 (3.61)	3.255 (1.437)	0.889 (1.888)	2.723 (3.492)	2.093 (1.581)	1.921 (4.921)	3.817 (2.143)	18.651 (1.766)	13.67 (1.264)	19.957 (2.184)	0.61 (4.362)	1.21 (2.656)
38	genistein	2.906 (4.324)	4.122 (1.596)	3.287 (3.678)	9.179 (1.708)	4.417 (1.459)	5.152 (2.186)	9.158 (1.626)	37.974 (1.501)	22.701 (1.451)	34.798 (3.606)	6.339 (4.663)	7.459 (1.25)
39	daidzein	0.783 (2.549)	6.711 (4.991)	3.64 (1.824)	9.676 (3.155)	9.449 (1.819)	7.521 (3.366)	1.856 (4.321)	3.85 (3.382)	4.258 (2.003)	14.639 (3.225)	19.103 (2.855)	4.386 (2.155)
40	kaempherol							4.054 (4.972)	18.787 (3.426)	9.683 (3.354)	18.453 (4.676)	3.885 (3.99)	0.829 (3.365)
41	dihydrogenistein	2.12 (4.523)	8.793 (1.258)	0.948 (1.95)	6.155 (1.089)	7.376 (4.011)	3.579 (4.696)	7.834 (2.372)	32.542 (2.918)	23.728 (4.023)	38.572 (2.285)	1.52 (2.576)	0.687 (3.478)
42	dihydrokaempferol							1.794 (3.636)	13.202 (2.801)	10.603 (3.435)	14.393 (1.492)	1.178 (1.125)	24.02 (4.265)
43	quercetin	3.259 (4.539)	4.109 (2.382)	1.257 (1.56)	1.655 (3.362)	3.907 (2.808)	2.051 (3.835)	0.563 (4.15)	4.69 (3.888)	0.824 (4.568)	4.626 (2.338)	1.152 (3.981)	1.66 (2.357)
44	myrcetin	45.521 (3.155)	75.51 (3.433)	10.801 (3.842)	81.156 (2.446)	25.959 (2.257)	21.578 (4.444)	11.906 (1.071)	55.793 (2.229)	42.007 (3.528)	65.23 (1.913)	10.097 (1.676)	4.993 (1.876)
45	isorhamnetin	1.227 (1.199)	2.119 (4.27)	0.587 (1.924)	1.321 (3.574)	16.277 (4.324)	13.013 (1.929)	33.731 (4.045)	157.631 (1.436)	114.185 (3.095)	184.105 (2.79)	28.523 (4.616)	12.893 (1.257)
46	dihydroquercetin							7.194 (3.379)	28.319 (1.7)	22.336 (1.312)	65.631 (3.477)	3.477 (2.962)	2.145 (2.086)
