# Supplementary material for: Transcriptomics and Metabolomics of Reactive Oxygen Species Modulation in Near-Null Magnetic Field-Induced Arabidopsis thaliana
Source: Biomolecules. 2022 Dec 6;12(12):1824. doi: 10.3390/biom12121824 (PMC9775259; doi:10.3390/biom12121824)
Supplement: Supplementary file 1 [file biomolecules-12-01824-s001.zip › Supplementary Table S6.xlsx]

## Sheet: Supplementary Table S6
Supplementary Table S6: Tukey’s HSD post hoc differences in polyphenol content. *P<0.05; **P<0.01; ***P<0.001
	GMF SHOOT 96H	NNMF SHOOT 96H	GMF ROOT 96H	NNMF ROOT 96H	GMF SHOOT 48H	NNMF SHOOT 48H	GMF ROOT 48H	NNMF ROOT 48H	GMF SHOOT 24H	NNMF SHOOT 24H	GMF ROOT 24H	NNMF ROOT 24H
GMF SHOOT 96H		-79.4147	-82.489	-117.2331***	352.5513***	799.1552***	-128.6307***	59.8641***	56.205***	503.3314***	-95.3994***	5.457
NNMF SHOOT 96H	79.4147***		-3.0743*	-37.8183*	431.966***	878.57***	-49.216***	139.2788***	135.6197***	582.7461***	-15.9846	84.8717***
GMF ROOT 96H	82.489***	3.0743*		-34.744***	435.0403***	881.6443***	-46.1417	142.3532***	138.6941***	585.8205***	-12.9103	87.946***
NNMF ROOT 96H	117.2331***	37.8183***	34.744***		469.7844***	916.3883***	-11.3976***	177.0972***	173.4381***	620.5645***	21.8336***	122.6901***
GMF SHOOT 48H	-352.5513***	-431.966***	-435.0403***	-469.7844***		446.6039***	-481.1821***	-292.6871***	-296.3462***	150.7801***	-447.9507***	-347.0943***
NNMF SHOOT 48H	-799.1552***	-878.57***	-881.6443***	-916.3883	-446.6039***		-927.786***	-739.2911***	-742.9502***	-295.8238***	-894.5546*	-793.6982***
GMF ROOT 48H	128.6307***	49.216***	46.1417***	11.3976***	481.1821***	927.786***		188.4949	184.8358	631.9622***	33.2313***	134.0877***
NNMF ROOT 48H	-59.8641***	-139.2788***	-142.3532***	-177.0972***	292.6871***	739.2911***	-188.4949***		-3.659***	443.4673***	-155.2635***	-54.4071***
GMF SHOOT 24H	0***	-135.6197***	-138.6941***	-173.4381***	296.3462***	742.9502***	-184.8358***	3.659***		447.1264***	-151.6044***	-50.748***
NNMF SHOOT 24H	-503.3314***	-582.7461	-585.8205	-620.5645	-150.7801***	295.8238***	-631.9622*	-443.4673***	-447.1264***		-598.7308***	-497.8744***
GMF ROOT 24H	95.3994	15.9846***	12.9103***	-21.8336***	447.9507***	894.5546***	-33.2313***	155.2635***	151.6044***	598.7308***		100.8564
NNMF ROOT 24H	-5.457	-84.8717	-87.946	-122.6901	347.0943	793.6982	-134.0877	54.4071	50.748	497.8744	-100.8564
