# Supplementary material for: Transcriptomics and Metabolomics of Reactive Oxygen Species Modulation in Near-Null Magnetic Field-Induced Arabidopsis thaliana
Source: Biomolecules. 2022 Dec 6;12(12):1824. doi: 10.3390/biom12121824 (PMC9775259; doi:10.3390/biom12121824)
Supplement: Supplementary file 1 [file biomolecules-12-01824-s001.zip › Supplementray Table S7.xlsx]

## Sheet: Suppl Table S7
Supplementary Table S7. Genes selected for their involvement in polyphenol metabolism
		ROOTS				SHOOTS
Gene locus	Gene name	4 hR	24 hR	48 hR	96 hR	4 hS	24 hS	48 hS	96 hS
At5g65550	UDP-glucoronosyl/UDP-glucosyl transferase family protein	1.15 ± 0.63	0.8 ± 0.26	1.32 ± 0.25	1.75 ± 0.27	0.87 ± 0.27	1.26 ± 0.24	0.61 ± 0.22	1.86 ± 0.56
At1g66390	ATMYB90, MYB DOMAIN PROTEIN 90, MYB90, PAP2, PRODUCTION OF ANTHOCYANIN PIGMENT 2	1.3 ± 0.19	1.07 ± 0.12	2.12 ± 0.36	2.07 ± 0.07	1.44 ± 0.6	0.91 ± 0.32	0.81 ± 0.31	3.09 ± 0.54
At5g63580	ATFLS2, FLAVONOL SYNTHASE 2, FLS2	0.94 ± 0.15	0.91 ± 0.22	0.88 ± 0.24	0.87 ± 0.36	1.62 ± 0.26	1.57 ± 0.35	0.84 ± 0.06	0.95 ± 0.29
At4g35420	DIHYDROFLAVONOL 4-REDUCTASE-LIKE1, DRL1, TETRAKETIDE ALPHA-PYRONE REDUCTASE 1, TKPR1	0.92 ± 0.06	0.93 ± 0.19	0.95 ± 0.08	1.11 ± 0.19	1.1 ± 0.24	1.04 ± 0.14	0.89 ± 0.16	0.96 ± 0.04
At1g32100	pinoresinol reductase 1	0.79 ± 0.08	1.06 ± 0.25	0.88 ± 0.21	1.02 ± 0.14	0.89 ± 0.14	0.85 ± 0.06	0.9 ± 0.28	1.23 ± 0.21
At4g00040	chalcone and stilbene synthase family protein	1.1 ± 0.13	0.95 ± 0.07	1.05 ± 0.16	1.02 ± 0.1	1.24 ± 0.28	1.14 ± 0.3	0.93 ± 0.16	1.01 ± 0.21
At1g02050	chalcone and stilbene synthase family protein LAP6, LESS ADHESIVE POLLEN 6, PKSA, POLYKETIDE SYNTHASE A	0.93 ± 0.13	0.99 ± 0.15	0.93 ± 0.06	0.87 ± 0.15	1.05 ± 0.06	0.97 ± 0.07	0.94 ± 0.05	0.94 ± 0.1
At1g48860	5-ENOLPYRUVYLSHIKIMATE-3-PHOSPHATE SYNTHASE, EPSPS	0.84 ± 0.06	0.96 ± 0.12	0.98 ± 0.14	0.9 ± 0.1	0.89 ± 0.09	0.86 ± 0.08	0.95 ± 0.08	0.96 ± 0.09
At1g50580	UDP-Glycosyltransferase superfamily protein	0.95 ± 0.12	1.2 ± 0.24	0.93 ± 0.12	0.98 ± 0.08	1.45 ± 0.47	0.77 ± 0.1	0.96 ± 0.2	2.19 ± 0.92
At1g75300	similar to an isoflavone reductase	0.95 ± 0.07	0.77 ± 0.08	0.94 ± 0.12	0.98 ± 0.13	0.89 ± 0.45	1.05 ± 0.15	0.99 ± 0.1	1.03 ± 0.29
At1g75280	isoflavone reductase, putative	0.84 ± 0.08	0.93 ± 0.17	0.99 ± 0.1	1.1 ± 0.07	0.8 ± 0.13	0.86 ± 0.09	0.99 ± 0.15	0.92 ± 0.2
At4g39230	ATPCBER1, PCBER1, PHENYLCOUMARAN BENZYLIC ETHER REDUCTASE 1 catalyzes NADPH-dependent reduction of 8-5' linked lignans such as dehydrodiconiferyl alcohol to give isodihydrodehydrodiconiferyl alcohol.	0.91 ± 0.08	1.17 ± 0.17	0.97 ± 0.12	1.08 ± 0.04	0.81 ± 0.11	0.85 ± 0.04	1.01 ± 0.09	0.93 ± 0.18
At5g07990	CYP75B1 Required for flavonoid 3' hydroxylase activity. Enzyme abundance relative to CHS determines Quercetin/Kaempferol metabolite ratio	1 ± 0.15	0.96 ± 0.09	1.15 ± 0.14	1.02 ± 0.26	1.1 ± 0.18	0.98 ± 0.17	1.02 ± 0.15	0.91 ± 0.1
At5g63595	ATFLS4, FLAVONOL SYNTHASE 4, FLS4	1.03 ± 0.11	1.1 ± 0.04	1.02 ± 0.12	0.98 ± 0.09	0.87 ± 0.25	0.81 ± 0.45	1.02 ± 0.19	1.21 ± 0.39
At5g54160	O-methyltransferase (OMT1)	1 ± 0.12	0.95 ± 0.05	1.01 ± 0.14	1.08 ± 0.09	1.03 ± 0.08	0.95 ± 0.06	1.04 ± 0.01	1.11 ± 0.05
At2g45300	3-phosphoshikimate 1-carboxyvinyltransferase / 5-enolpyruvylshikimate-3-phosphate / EPSP synthase	0.91 ± 0.06	1.03 ± 0.05	0.98 ± 0.07	0.98 ± 0.08	0.89 ± 0.11	0.98 ± 0.14	1.05 ± 0.07	1.03 ± 0.1
At2g18560	UDP-glucoronosyl/UDP-glucosyl transferase family protein	1.11 ± 0.2	1.15 ± 0.09	1.12 ± 0.14	1.22 ± 0.1	1.14 ± 0.14	1.09 ± 0.22	1.06 ± 0.09	1.1 ± 0.03
At4g13660	pinoresinol reductase 2	0.98 ± 0.02	1.03 ± 0.13	0.97 ± 0.02	0.91 ± 0.07	0.99 ± 0.19	0.89 ± 0.25	1.08 ± 0.18	0.77 ± 0.29
At3g55120	CFI, CHALCONE FLAVANONE ISOMERASE, CHALCONE ISOMERASE, CHI, TRANSPARENT TESTA 5, TT5	1 ± 0.17	0.89 ± 0.15	1.04 ± 0.1	1.13 ± 0.27	1.08 ± 0.17	0.99 ± 0.28	1.12 ± 0.07	0.98 ± 0.09
At4g34850	chalcone and stilbene synthase family protein LAP5, LESS ADHESIVE POLLEN 5, PKSB, POLYKETIDE SYNTHASE B	1.44 ± 0.12	1.14 ± 0.08	1.06 ± 0.12	1.03 ± 0.03	0.96 ± 0.27	1.34 ± 0.07	1.12 ± 0.15	1.19 ± 0.21
At5g17040	UDP-glucoronosyl/UDP-glucosyl transferase family protein	1.77 ± 0.52	0.97 ± 0.15	0.92 ± 0.12	0.83 ± 0.1	2 ± 0.3	0.76 ± 0.22	1.12 ± 0.27	1.02 ± 0.24
At2g37040	ATPAL1, PAL1, PHE AMMONIA LYASE 1	0.96 ± 0.14	0.93 ± 0.12	1.02 ± 0.08	1.05 ± 0.16	0.9 ± 0.25	1.07 ± 0.19	1.18 ± 0.1	1.14 ± 0.12
At5g63590	ATFLS3, FLAVONOL SYNTHASE 3, FLS3	1.09 ± 0.13	0.94 ± 0.15	1.03 ± 0.2	0.99 ± 0.11	1 ± 0.48	0.71 ± 0.29	1.18 ± 0.17	1.22 ± 0.35
At5g17050	UDP-glucoronosyl/UDP-glucosyl transferase family protein	0.99 ± 0.13	1.05 ± 0.1	1.04 ± 0.02	1.06 ± 0.13	0.88 ± 0.27	1.03 ± 0.11	1.2 ± 0.16	1.08 ± 0.12
At5g05270	ATCHIL, CHALCONE ISOMERASE LIKE, CHIL	1.14 ± 0.1	1.04 ± 0.05	0.97 ± 0.26	0.85 ± 0.07	0.73 ± 0.27	1.01 ± 0.24	1.23 ± 0.18	1.13 ± 0.18
At5g08640	ATFLS1, FLAVONOL SYNTHASE, FLAVONOL SYNTHASE 1, FLS, FLS1	1.04 ± 0.13	0.91 ± 0.11	1.05 ± 0.03	1.02 ± 0.26	1.15 ± 0.48	1.08 ± 0.52	1.46 ± 0.28	1.2 ± 0.17
At3g51240	F3'H, F3H, FLAVANONE 3-HYDROXYLASE, TRANSPARENT TESTA 6, TT6	0.97 ± 0.13	1.04 ± 0.09	1.03 ± 0.07	0.79 ± 0.14	0.99 ± 0.18	1.1 ± 0.38	1.47 ± 0.04	1.21 ± 0.1
At5g63600	ATFLS5, FLAVONOL SYNTHASE 5, FLS5	1.04 ± 0.1	1.02 ± 0.14	1.01 ± 0.19	1.16 ± 0.16	1.24 ± 0.27	0.84 ± 0.5	1.48 ± 0.47	2.13 ± 0.01
At5g13930	ATCHS, CHALCONE SYNTHASE, CHS, TRANSPARENT TESTA 4, TT4	1.22 ± 0.27	0.93 ± 0.16	1.04 ± 0.09	1.02 ± 0.23	1.06 ± 0.82	1.15 ± 0.49	1.52 ± 0.4	1.14 ± 0.11
At4g22880	ANS, ANTHOCYANIDIN SYNTHASE, LDOX, LEUCOANTHOCYANIDIN DIOXYGENASE, TANNIN DEFICIENT SEED 4, TDS4, TT18	0.3 ± 0.23	0.73 ± 0.27	2.39 ± 0.86	2.96 ± 1.63	0.91 ± 0.27	1.44 ± 1.06	1.66 ± 0.26	1.06 ± 0.49
At5g42800	DFR, DIHYDROFLAVONOL 4-REDUCTASE, M318, TT3 Catalyzes the conversion of dihydroquercetin to leucocyanidin in the biosynthesis of anthocyanins	0.11 ± 0.03	0.92 ± 0.4	2.57 ± 1.25	0.39 ± 0.15	2.13 ± 3.23	1.54 ± 1.01	2.01 ± 0.51	2.32 ± 1.07
At1g61720	BAN, BANYULS Negative regulator of flavonoid biosynthesis	2.31 ± 0.47	1.9 ± 0.24	1.49 ± 0.22	1.82 ± 0.22	1.9 ± 0.3	1.68 ± 0	2.33 ± 0.15	2.61 ± 0.17
At5g17030	UDP-glucoronosyl/UDP-glucosyl transferase family protein	2.13 ± 0.42	2 ± 0.18	2.17 ± 0.44	2.27 ± 0.44	1.7 ± 0.44	2.56 ± 0.63	2.34 ± 0.37	2.18 ± 0.45
At5g66220	chalcone and stilbene synthase family protein	1.18 ± 0.38	1.87 ± 0.19	2.33 ± 0.29	2.89 ± 0.99	2.05 ± 0.27	1.94 ± 0.39	2.39 ± 0.27	3.5 ± 0.47
At5g43935	ATFLS6, FLAVONOL SYNTHASE 6, FLS6	2.39 ± 0.4	1.98 ± 0.19	2.22 ± 0.32	2.01 ± 0.11	2.08 ± 0.3	2.19 ± 0.57	2.5 ± 0.19	2.56 ± 0.69
At1g75290	similar to an isoflavone reductase	2.53 ± 0.27	2.03 ± 0.18	2.3 ± 0.33	2.09 ± 0.11	2.12 ± 0.33	2.3 ± 0.5	2.75 ± 0.47	2.98 ± 0.36
